1                    Spatial sampling in human visual cortex is  
2                    modulated by both spatial and feature-based  
3                    attention

4                    D.M. van Es<sup>1</sup>            J. Theeuwes<sup>1</sup>            T. Knapen<sup>1,2</sup>

5                    *Affiliation*

6                    <sup>1</sup>Behavioral and Movement Sciences, Vrije Universiteit Amsterdam, 1081 BT Amster-  
7                    dam, the Netherlands

8                    <sup>2</sup>Spinoza Centre for Neuroimaging, Royal Academy of Sciences, 1105 BK, Amster-  
9                    dam, the Netherlands

10                    *Corresponding Authors:*

11                    D.M. van Es (daan.van.es@gmail.com); T. Knapen (tknapen@gmail.com)

12                    *Conflict of interest*

13                    The authors declare no competing financial interests.

14                    *Acknowledgements:*

15                    This study was supported in part by an Open Research Area grant (ORA; #464-11-  
16                    030) issued by the Netherlands Organisation for Scientific Research (NWO) to JT.

## *Abstract*

17

18 Spatial attention changes the sampling of visual space. Behavioral studies suggest that  
19 feature-based attention modulates this resampling to optimize the attended feature's sam-  
20 pling. We investigate this hypothesis by estimating spatial sampling in visual cortex while  
21 independently varying both feature-based and spatial attention.

22 Our results show that spatial and feature-based attention interacted: resampling of  
23 visual space depended on both the attended location and feature (color vs. temporal fre-  
24 quency). This interaction occurred similarly throughout visual cortex, regardless of an  
25 area's overall feature preference. However, the interaction did depend on spatial sampling  
26 properties of voxels that prefer the attended feature. These findings are parsimoniously  
27 explained by variations in the precision of an attentional gain field.

28 Our results demonstrate that the deployment of spatial attention is tailored to the  
29 spatial sampling properties of units that are sensitive to the attended feature.

## Introduction

30  
31 The resolution of the visual system is highest at the fovea and decreases gradually with  
32 increasing eccentricity. But the visual system's resolution is not fixed. Attention can be  
33 directed to a location in space and/or a visual feature, which temporarily improves percep-  
34 tual sensitivity (Posner et al., 1980; Rossi and Paradiso, 1995; Found and Müller, 1996;  
35 Carrasco and Yeshurun, 1998; Yeshurun and Carrasco, 1999; Kumada, 2001; Saenz et  
36 al., 2003; Wolfe et al., 2003; Theeuwes and van der Burg, 2007) at the cost of reduced  
37 sensitivity for non-attended locations and features (Kastner and Pinsk, 2004; Pestilli and  
38 Carrasco, 2005; Wegener et al., 2008).

39 Attending a location in space increases activity in units representing the attended lo-  
40 cation, as shown by both electrophysiological (Luck et al., 1997; Reynolds et al., 2000) and  
41 fMRI studies (Tootell et al., 1998; Silver et al., 2005; Datta and DeYoe, 2009). In addition,  
42 spatial receptive fields were shown to shift toward an attended location in macaque MT+  
43 (Womelsdorf et al., 2006) and V4 (Connor et al., 1997). Using fMRI to measure popula-  
44 tion receptive fields (pRFs; Dumoulin and Wandell, 2008; Dumoulin and Knapen, 2018),  
45 it was found that pRF shifts induced by spatial attention occur throughout human visual  
46 cortex (Klein et al., 2014; Kay et al., 2015; Sheremata and Silver, 2015; Vo et al., 2017), a  
47 process thought to improve visual resolution at the attended location (Anton-Erxleben  
48 and Carrasco, 2013; Kay et al., 2015; Vo et al., 2017). Such *spatial resampling* is under-  
49 stood as the result of an interaction between bottom-up sensory signals and a top-down  
50 attentional gain field (Womelsdorf et al., 2008; Klein et al., 2014; Miconi and VanRullen,  
51 2016).

52 Feature-based attention, for example directed toward color or motion, selectively in-  
53 creases activity in those units that represent the attended feature, as evidenced by electro-  
54 physiological (Treue and Maunsell, 1996; Treue and Trujillo, 1999; McAdams and Maun-  
55 sell, 2000; Maunsell and Treue, 2006; Müller et al., 2006; Zhang and Luck, 2009; Zhou  
56 and Desimone, 2011), fMRI (Saenz et al., 2002; Serences and Boynton, 2007; Jehee et al.,  
57 2011), and behavioral reports (Saenz et al., 2003; White and Carrasco, 2011). These stud-  
58 ies consistently show that feature-based attention modulates processing irrespective of  
59 the attended stimulus's spatial location. In addition, feature-based attention also appears

60 to shift featural tuning curves toward the attended value, as reported by both electrophys-  
61 iological (Motter, 1994; David et al., 2008) and fMRI studies (Çukur et al., 2013).

62 The similarity in the effects of feature-based and spatial attention on affected neu-  
63 ral units suggests a common neural mechanism for both sources of attention (Hayden  
64 and Gallant, 2005; Cohen and Maunsell, 2011). Yet spatial attention necessitates retino-  
65 topically precise feedback (Miconi and VanRullen, 2016), while feature-based attention  
66 operates throughout the visual field (Maunsell and Treue, 2006). Studies investigating  
67 whether one source of attention potentiates the other generally find that interactions are  
68 either nonexistent or very weak at the earliest stages of processing (David et al., 2008; Hay-  
69 den and Gallant, 2009; Patzwahl and Treue, 2009; Zhang and Luck, 2009), but emerge at  
70 later stages of visual processing (Hillyard and Munte, 1984; Handy et al., 2001; Bengson et  
71 al., 2012; Ibos and Freedman, 2016), and ultimately influence behavior (Kingstone, 1992;  
72 Kravitz and Behrmann, 2011; Leonard et al., 2015; White et al., 2015; Nordfang et al.,  
73 2017). In addition, the effects of feature-based compared to spatial attention arise earlier  
74 in time (Hopf et al., 2004; Hayden and Gallant, 2005; Andersen et al., 2011). This supports  
75 the idea that feature-based attention can direct spatial attention toward or away from  
76 specific locations containing attended or unattended features (Cohen and Shoup, 1997;  
77 Cepeda et al., 1998; Burnett et al., 2016). Especially when attention is endogenously cued,  
78 feature-based attention has been argued to influence the spatial resampling induced by  
79 spatial attention in order to optimize sampling of visual features for behavior (Yeshurun  
80 and Carrasco, 1998, 2000; Yeshurun et al., 2008; Barbot and Carrasco, 2017). Together,  
81 these studies suggest that feature-based attention can influence the spatial resampling re-  
82 sulting from spatial attention.

83 To investigate this hypothesis directly, we measured pRFs under conditions of differ-  
84 ential spatial attention (i.e. toward fixation or the mapping stimulus) and feature-based  
85 attention (i.e. toward the mapping stimulus's motion or color content). We first char-  
86 acterize how spatial attention influences the sampling of visual space, and subsequently  
87 investigate how feature-based attention modulates this spatial resampling. An explicit  
88 gain-field interaction model allowed us to formally capture the pRF position changes re-  
89 sulting from our attentional manipulations (Klein et al., 2014).

90 In brief, our results show that pRF changes are stronger when attending the stimulus's

91 color compared to temporal frequency content. These modulations occurred similarly  
92 throughout the visual system, regardless of an area's bottom-up feature preference (such  
93 as areas MT+ for temporal frequency and areas VO and hV4 for color (Liu and Wandell,  
94 2005; Brouwer and Heeger, 2009, 2013)). We suggest that the larger degree of spatial  
95 resampling when attending color is related to finer spatial sampling in relatively color  
96 preferring voxels. In addition, we show that these feature-based attentional modulations  
97 can be explained by changes in the precision of the attentional gain field.

## 98 *Results*

99 We first characterize the pattern of pRF parameter changes that resulted from the differen-  
100 tial allocation of spatial attention (i.e. either toward fixation or the moving bar stimulus).  
101 We explain this pattern of results from an attentional gain field perspective. Then, we  
102 investigate how feature-based attention (i.e. either toward color or temporal frequency  
103 changes in the bar) modulated the pRF changes, and how this modulation relates to  
104 bottom-up feature preference.

### 105 *Region of interest definition*

106 Figure 1A shows voxels' *Attend Fixation* location preferences, by depicting color-coded  
107 polar angle coordinates on an inflated cortical surface for one example participant's right  
108 hemisphere. We examined the relation between pRF eccentricity and size within each  
109 of the retinotopic regions, and performed further analyses on those regions that showed  
110 clear progressions of polar angle on the surface as well as positive size-eccentricity rela-  
111 tions in all participants, as shown in Figure 1B (and Supplementary Figure 1). In addition,  
112 we created a *combined* ROI that pooled voxels across selected ROIs in order to evaluate  
113 pRF changes across the visual system.

### 114 *pRF changes induced by spatial attention*

115 In order to quantify pRF changes resulting from differential allocation of spatial atten-  
116 tion we created an *Attend Stimulus* condition by averaging pRF parameters between the

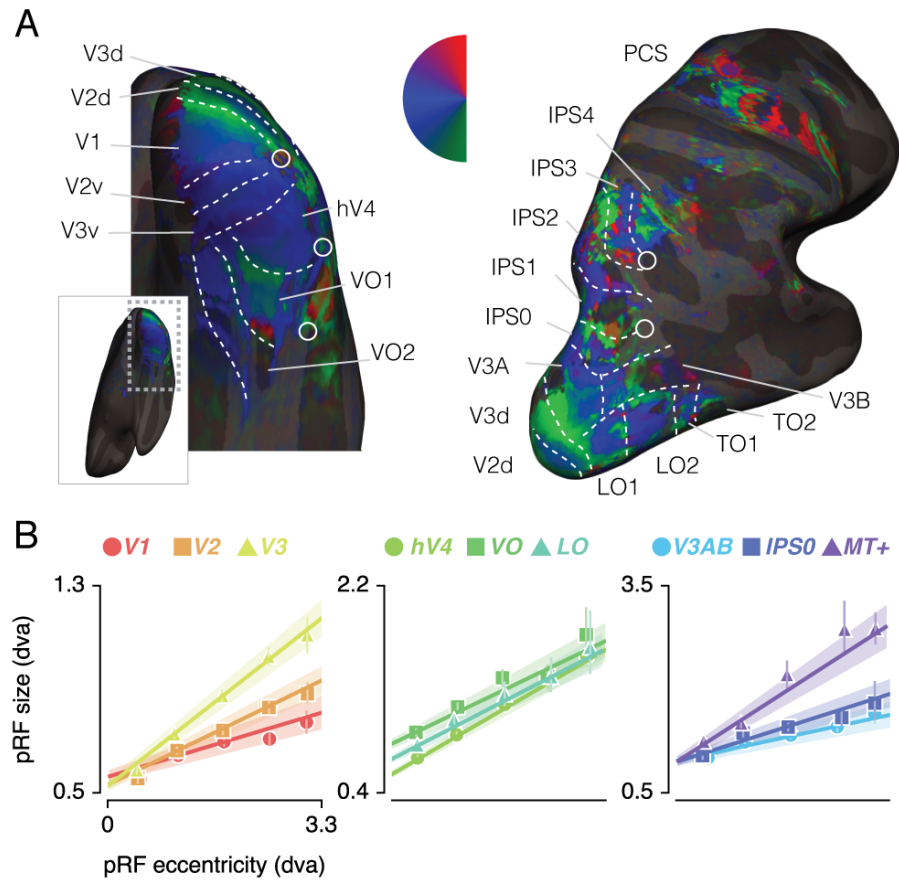

Figure 1: ROI definition A. *Attend Fixation* pRF polar angle maps for an example participant with retinotopic areas up to the intra-parietal sulcus defined by hand. B. *Attend Fixation* pRF size as a function of eccentricity for all areas that showed robust relationships across all participants. All error bars and shaded error regions denote 95% CI of data and linear fits respectively across voxels.

117 *Attend Color* and *Attend Temporal Frequency* (henceforth: *Attend TF*) conditions. To in-  
118 spect how spatial attention affected pRF positions, we plotted a vector from the *Attend*  
119 *Fixation* to the *Attend Stimulus* pRF position (Figure 2A and B and Supplementary Figure  
120 2). Visual inspection of these pRF position shifts shows both increasing shift magnitude  
121 up the visual hierarchy and shifts occurring mainly along the radial dimension (i.e. toward  
122 or away from the fovea).

### 123 *pRF shift direction*

124 This latter observation seems at apparent odds with a recent study reporting pRFs to  
125 mainly shift in the horizontal direction (Sheremata and Silver, 2015). To quantify the ob-  
126 served direction of pRF shifts we computed the ratio of shifts in the radial, horizontal, and  
127 vertical directions (see Figure 2C and Supplementary Figure 3). In line with the data of  
128 Sheremata and Silver (2015), we find that changes of pRF horizontal location consistently  
129 better describe the overall shifts than do changes of pRF vertical location in all ROIs ex-  
130 cept V1/2/3 ( $p$ 's < .05, see Supplementary Tables 1 and 10). We also find that pRF shifts  
131 are described even better by shifts in the radial dimension (i.e. changes in eccentricity)  
132 compared to shifts in the horizontal direction in all ROIs ( $p$ 's < .01, see Supplementary Ta-  
133 bles 1 and 11). Figure 2D is intended to ease interpretation of these results. It depicts how  
134 different hypotheses regarding the underlying directionality of pRF shifts (i.e. horizontal,  
135 vertical, or radial - i.e. foveopetal/foveofugal) translate into changes in measured pRF  $x$ ,  
136  $y$ , and eccentricity as a function of quarter visual field polar angle (i.e. from vertical to  
137 horizontal meridian). For example, if pRFs shift primarily in the radial direction (right  
138 hypothesis column, Figure 2D), this would result in strongest pRF  $x$ -direction changes  
139 close to the horizontal meridian and strongest pRF  $y$ -direction changes close to the ver-  
140 tical meridian. pRF eccentricity changes however, would show no dependence on polar  
141 angle. Figure 2D, right column, shows that the data (*combined* ROI) corresponds most  
142 to the radial shift hypothesis. To quantify this visual intuition, we compared the slopes  
143 of the change in pRF  $x$  and  $y$  over polar angle by binning polar angle into three bins and  
144 comparing the first and last bins (i.e. horizontal and vertical meridian respectively). This  
145 showed that, compared to the slope of pRF  $y$  change over polar angle, the slope of pRF  
146  $x$  change was more negative ( $p$  < .001, cohen's  $d$  = 0.677,  $N$  = 11946, see Supplementary

147 Figure 4). This pattern of results can only be explained by pRFs shifting in the radial direc-  
 148 tion. Visual field coverage is known to be non-uniform such that the horizontal meridian  
 149 is overrepresented at both subcortical (Schneider et al., 2004) and cortical (Swisher et al.,  
 150 2007; Silva et al., 2017) levels and was also clearly present in our data (Rayleigh tests for  
 151 non-uniformity in ROIs separately,  $p$ 's < .001, see Supplementary Tables 2, 12 and 13).  
 152 This means that shifts that occur exclusively in the radial dimension appear as a domi-  
 153 nance of horizontal compared to vertical shifts when averaging over the visual field.

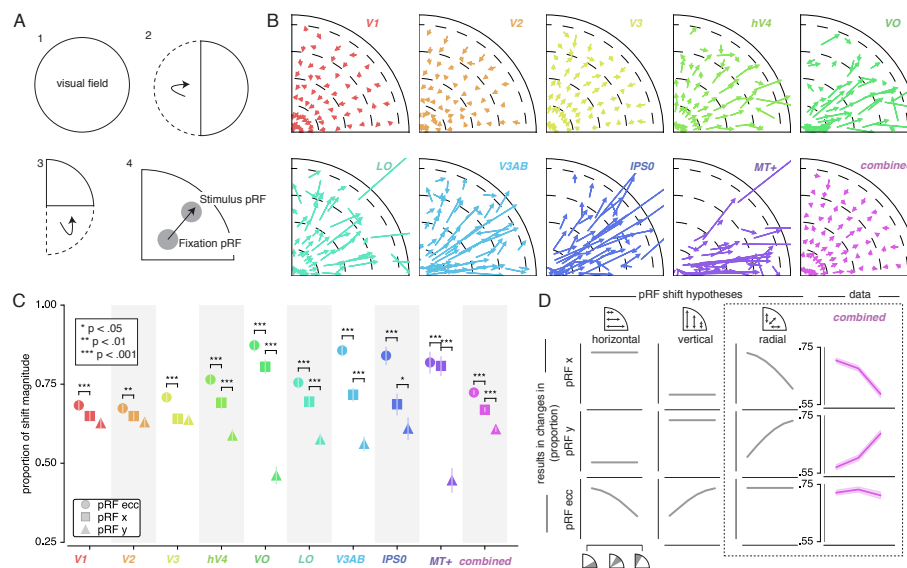

Figure 2: Effect of attention on pRF position. A. Plotting strategy. For pRF shift visualizations, all pRF positions are mirrored into one quadrant of the visual field. Then, vectors representing the shift of pRF centers between conditions were drawn from the *Attend Fixation* to the *Attend Stimulus* pRF position. B. Shift vectors as described in A. pRF shift magnitude increased up the visual hierarchy, and shifts appear to occur mainly in the radial direction (i.e. changes in pRF eccentricity). Dotted lines demarcate eccentricity bins used in subsequent analyses. C. Changes in pRF position in the horizontal, vertical, and radial directions as a proportion of the length of the shift vectors, as depicted in B. The magnitude of pRF shifts is consistently best described by changes in pRF eccentricity. D. pRF x, y and eccentricity position shifts plotted as a function of polar angle, for different shift direction hypotheses. The data closely matches the radial shift direction hypothesis, showing strongest pRF x shifts close to the horizontal meridian, strongest pRF y shifts close to the vertical meridian and strong pRF eccentricity changes across all polar angles. In C single, double, and triple asterisks indicate significant differences with FDR corrected  $p < .05$ ,  $< .01$  and  $< .001$  respectively.



154 *pRF changes across eccentricity*

155 To further inspect the attention-induced radial shifts described above, we plotted the  
156 difference between *Attend Stimulus* and *Attend Fixation* pRF eccentricity for each of four  
157 *Attend Fixation* pRF eccentricity bins (Figure 3A and Supplementary Figure 5). The *com-*  
158 *bined* ROI shows that overall, parafoveal pRFs shifted away from the fovea, while periph-  
159 eral pRFs shifted toward the fovea. These outward shifting parafoveal pRFs are found in  
160 all other ROIs except V1 and V2, whereas the inward shifting peripheral pRFs are also  
161 present in V1, V2 and V3 (see Supplementary Tables 3, 4, and 14-17).

162 In addition to pRF position changes, we also inspected changes in pRF size induced by  
163 differences in spatial attention as a function of *Attend Fixation* pRF eccentricity (Figure  
164 3B and Supplementary Figure 6). Overall, parafoveal pRFs increased in size, while periph-  
165 eral pRFs decreased in size. These expanding parafoveal pRFs were present in all ROIs  
166 except V2/3, whereas shrinking peripheral pRFs were found in all ROIs except V1, MT+  
167 and IPS0 (see Supplementary Tables 5, 6, and 18-21). Overall, this pattern of results is  
168 strikingly similar to the changes in pRF eccentricity described above. In fact, the changes  
169 in pRF size and eccentricity were strongly correlated in all ROIs (Figure 3C; Supplemen-  
170 tary Figure 6; Pearson R over 20 5-percentile bins between .74 and .99,  $p$ 's < .001, see  
171 Supplementary Tables 7 and 22). Together, these results show that attention to the stim-  
172 ulus caused parafoveal pRFs to shift away from the fovea and increase in size, whereas  
173 peripheral pRFs shifted toward the fovea and decreased in size.

174 *Formal account for observed pattern of pRF shifts*

175 In order to provide a mechanistic explanation for the complex pattern of pRF shifts  
176 described above, we modeled our results using a multiplicative Gaussian gain field model  
177 (Womelsdorf et al., 2008; Klein et al., 2014). We adapted this framework to work in condi-  
178 tions where attention shifted over space as a function of time (see Methods). In brief, this  
179 modeling procedure used the *Attend Fixation* pRF, one attentional gain field at fixation  
180 and another convolved with the stimulus in order to predict the *Attend Stimulus* pRF posi-  
181 tion. We determined optimal attentional gain field sizes by minimizing the difference be-  
182 tween observed and predicted *Attend Stimulus* pRF positions in the quadrant visual field  
183 format of Figure 2B. Figure 4A (and Supplementary Figure 7) illustrates that model pre-

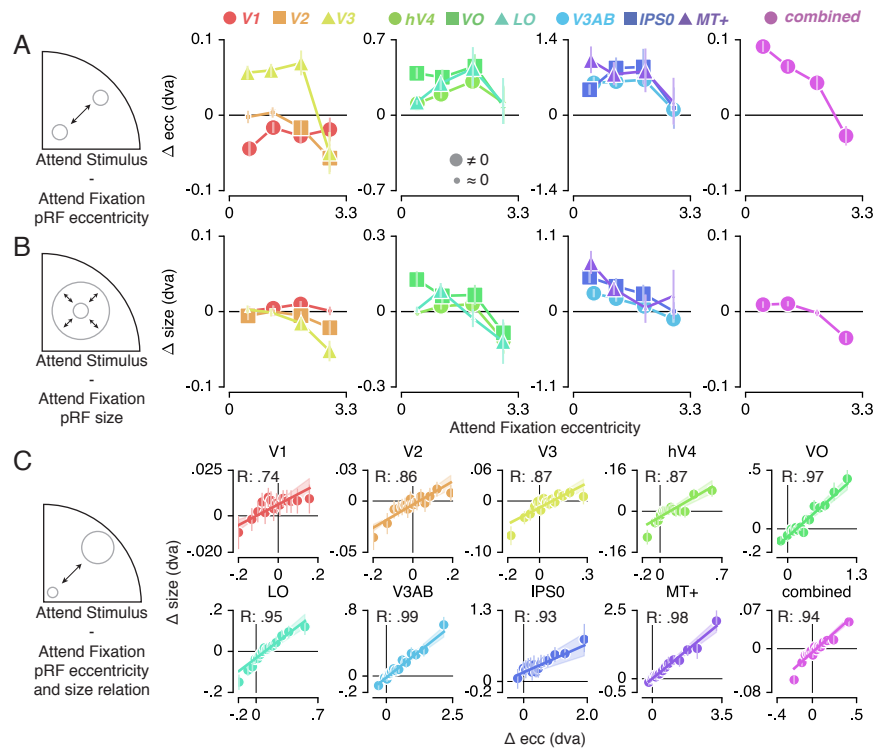

Figure 3: Effect of attention on pRF eccentricity and size. Difference between *Attend Stimulus* and *Attend Fixation* pRF eccentricity (A) and size (B) as a function of *Attend Fixation* eccentricity. Overall, parafoveal pRFs tend to shift away from the fovea and increase in size, while peripheral pRFs tend to shift toward the fovea and decrease in size. C. Changes in pRF eccentricity and size were strongly correlated in all ROIs. In A and B, markers are increased in size when bootstrapped distributions differ from 0 with FDR corrected  $p < .05$ . In C markers' errorbar denotes 95% CI of data over voxels and shaded error regions denote 95% CI of linear fit parameters over bins.

184 ductions closely followed the data, thereby accurately reproducing radially shifting pRFs.  
185 Examining the predicted change in pRF eccentricity as a function of eccentricity (i.e. the  
186 dominant pRF shift direction; Figure 4B and Supplementary Figure 8) showed that the  
187 model was able to capture widely varying eccentricity change profiles across ROIs using  
188 very similar attentional gain field sizes (Figure 4C). This shows that a common attentional  
189 influence can result in very different pRF shift patterns, which then necessarily depend  
190 on differential spatial sampling properties across ROIs (i.e. distribution of pRF sizes and  
191 positions). In sum, these results show that the attentional gain field model provides a  
192 parsimonious and powerful account for the variety of pRF shift patterns across ROIs.

193 We further investigated how the model was able to reproduce the eccentricity-  
194 dependent eccentricity changes we reported above. For this, we inspected pRF shifts  
195 induced by attending either fixation or the stimulus relative to the stimulus drive (i.e. the  
196 pRF outside the influence of attention derived from the model). For illustrative purposes,  
197 we here display results for V2, V3 and IPS0 as these areas showed marked differences in  
198 their eccentricity change profile (Figure 4D-F). The left panels of each figure reveal the  
199 effects of attending fixation and the stimulus separately. This shows that both sources of  
200 spatial attention pull the measured pRFs toward the fovea, albeit with differing relative  
201 magnitudes across eccentricity. The right panel of each figure shows that the resulting  
202 difference between attending fixation and the stimulus constitutes the eccentricity  
203 dependent patterns observed in the data (Figure 4B).

204 Together, these analyses show that existing multiplicative gain field models of atten-  
205 tion can be extended to predict pRF shifts in situations where spatial attention shifts over  
206 time. Additionally it confirms, extends, and quantifies earlier reports showing that the  
207 precision of the attentional gain field is similar across the visual hierarchy (Klein et al.,  
208 2014).

#### 209 *Feature-based attentional modulation*

210 Having established (1) the pattern of changes in spatial sampling (i.e. changes in pRF size  
211 and eccentricity) resulting from differential allocation of spatial attention and (2) a mech-  
212 anistic explanation of these changes, we next examined how this pattern was modulated

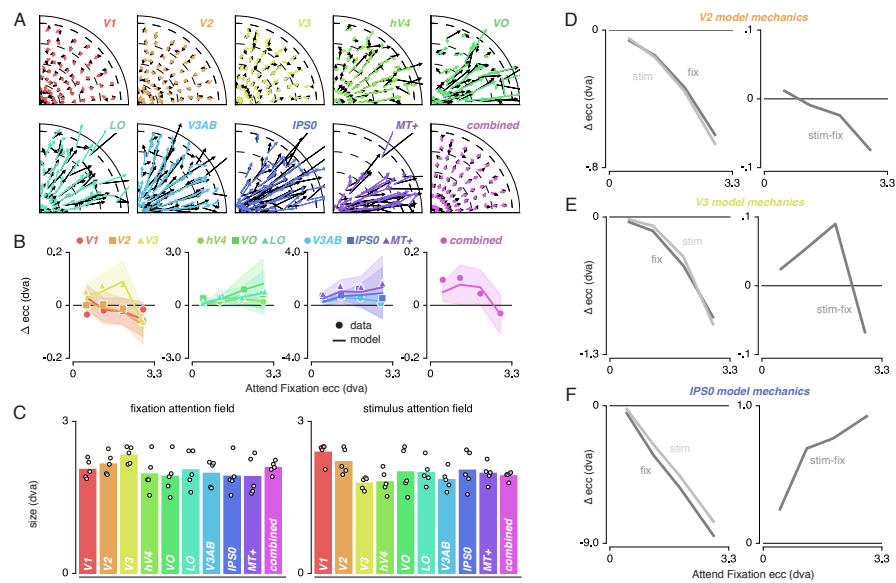

Figure 4: An attentional gain field model showed that the changes in pRF position can be described by a Gaussian interaction process. A. Observed (black) and predicted (color) pRF shifts. B. Observed and predicted changes in pRF eccentricity (the main pRF shift direction) as a function of eccentricity. Markers depict data and lines the corresponding attentional gain field model fit. C. Fitted fixation and stimulus attentional gain field sizes. Dots depict individual subjects, and the bar the average across subjects. D-F. Left panels depict changes in eccentricity induced by attending fixation (dark gray lines) and by attending the stimulus (light gray lines). Although both sources of attention cause a pull toward the fovea in all ROIs, relative shift magnitude differs across eccentricity. The right panels show how the difference between both spatial attention conditions results in the patterns as observed in B. In B, Error bars denote 95% CIs over subjects. Plotting conventions as in Figure 2.

213 by differences in feature-based attention. Figure 5A (and Supplementary Figure 9) shows  
214 how pRF eccentricity and size are differentially affected by attending color or temporal  
215 frequency within the stimulus for the *combined* ROI. This illustrates that while both tasks  
216 caused similar pRF changes, these effects were generally more pronounced when attend-  
217 ing color.

218 In order to quantify the modulation of feature-based attention per voxel we first setup  
219 a single robust index of the of the degree to which spatial attention resampled visual space,  
220 combining changes in pRF eccentricity and size (as these were highly correlated, see Fig-  
221 ure 3C). This Attentional Modulation Index (AMI, see Methods) is depicted in Figure 5B  
222 for the *combined* ROI when attending color and TF. We then quantified the difference in  
223 this attentional modulation index between attending color and temporal frequency as a  
224 feature-based Attentional Modulation Index (feature AMI, see Methods). Positive values  
225 of feature AMI indicate that attending color induced greater pRF changes, while negative  
226 values indicate that attending TF lead to stronger pRF changes. Figure 5C shows that this  
227 feature AMI was positive across eccentricity in the *combined* ROI. Inspecting the average  
228 feature AMI across voxels within each ROI (Figure 5D) reveals that attending changes  
229 in color compared to TF in the bar stimulus produced stronger spatial resampling in all  
230 ROIs ( $p$ 's < .01, see Supplementary Tables 8 and 23).

### 231 *Feature AMI and feature preference*

232 The feature-based modulations we describe above are possibly related to differences  
233 in bottom-up preference for the attended features. Feature-based attention is known to  
234 increase activity of neurons selective for the attended feature, regardless of spatial lo-  
235 cation (Treue and Maunsell, 1996; Treue and Trujillo, 1999; McAdams and Maunsell,  
236 2000; Maunsell and Treue, 2006; Müller et al., 2006; Zhang and Luck, 2009; Zhou and  
237 Desimone, 2011). If voxels contain on average more color-preferring compared to TF-  
238 preferring neurons, attending color should therefore activate a greater amount of neu-  
239 rons, potentially leading to a greater apparent shift of the aggregate pRF. To test this hy-  
240 pothesis, we estimated the difference in response amplitude to the presence of color and  
241 temporal frequency within a full-field stimulus (in a separate experiment, see Methods).  
242 We then summarized each voxels' relative preference for color and temporal frequency

243 by means of a feature preference index. Higher values of this feature preference index in-  
244 dicate greater preference for color compared to TF. Figure 5E (and Supplementary Figure  
245 10) displays the feature AMI as a function of feature preference, for each ROI. Note that  
246 feature preference was negative on average in most ROIs, suggesting that our TF manip-  
247 ulation (7 vs 0 Hz grayscale Gabors) caused stronger response modulations compared to  
248 our color manipulation (colored vs grayscale Gabors). Although this induced an offset  
249 across the brain, variations in this measure across ROIs replicate known specializations of  
250 the visual system with high precision (Liu and Wandell, 2005; Brouwer and Heeger, 2009,  
251 2013): while areas MT+ and V1 show the strongest preference for TF compared to color,  
252 areas V4 and VO show the strongest preference for color compared to TF. Importantly,  
253 regardless of these large variations in feature preferences between MT+/V1 and VO/hV4,  
254 average feature AMI was nearly equal in these ROIs. In addition, there was no correla-  
255 tion between feature preference and feature AMI across all ROIs ( $R = .20$ ,  $p = .608$ ,  $N =$   
256  $9$ ,  $\rho = .37$ ,  $p = .332$ ,  $N = 9$ ). These results show that the feature-based attentional mod-  
257 ulations we observe occur globally across the brain, and do not depend on bottom-up  
258 feature preference.

#### 259 *Feature preference and spatial sampling*

260 What could then explain the fact that attending color in the stimulus induced greater  
261 changes in spatial sampling? Behavioral studies have suggested that the influence of spa-  
262 tial attention should be adjusted by feature-based attention in order to improve sampling  
263 of attended visual features (Yeshurun et al., 2008; Barbot and Carrasco, 2017). One of the  
264 factors that influences required spatial resampling is pRF size. Smaller pRFs need to shift  
265 a greater distance in order to bring a stimulus into their responsive region. This means  
266 that if color-preferring voxels are relatively small, this creates a requirement of greater  
267 shifts when attending color. Indeed, both pRF size (Dumoulin and Wandell, 2008) and  
268 color compared to TF preference (Curcio et al., 1990; Azzopardi et al., 1999; Brewer et al.,  
269 2005) are known to be strongly eccentricity dependent such that foveal voxels have rela-  
270 tively small pRFs and are relatively color sensitive. We also clearly observe both effects  
271 in our data (see Figure 1B and Supplementary Figure 1; and Figure 6 and Supplementary  
272 Figure 11, correlation between feature-preference and eccentricity is negative except in

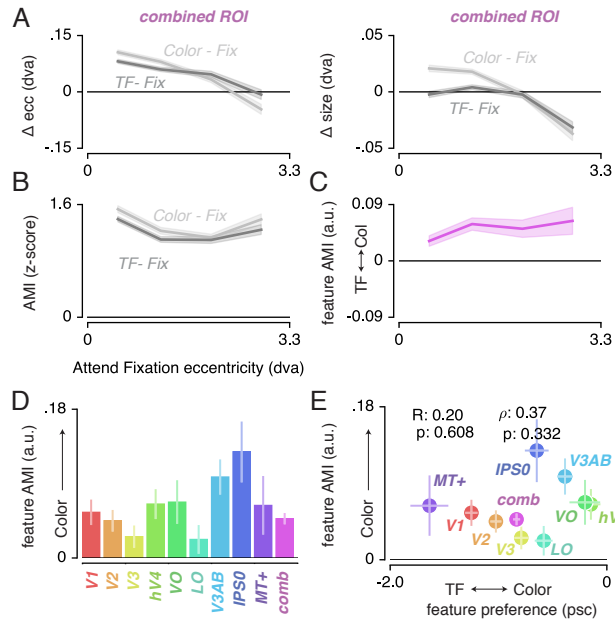

Figure 5: Feature-based attentional modulation across ROIs. A. Differences in pRF eccentricity and size relative to the *Attend Fixation* condition, for both the *Attend Color* and *Attend TF* condition. The changes in both eccentricity and size are more pronounced when attending changes in color versus TF changes in the bar. B. The Attentional Modulation Index (AMI) combines eccentricity and size changes to form one robust index of spatial attention and is greater when attending color compared to TF. C. The feature AMI quantifies this difference. Positive values of this feature AMI across eccentricity confirm stronger pRF modulations when attending color compared to TF. D. Average feature AMI for each ROI, extending greater observed pRF modulations when attending color compared to TF to all individual ROIs. E. Average feature AMI as a function of average feature preference across ROIs. Feature preference increases with higher color compared to TF preference. Although hV4 and VO are relatively sensitive to color and MT+ is relatively sensitive to TF, feature AMI is comparable in these areas. Errorbars denote 95% CI over voxels.

273 LO and VO, see Supplementary Tables 9 and 24). This means that the greater amount of  
 274 spatial resampling when attending color can be parsimoniously explained by color being  
 275 sampled by relatively smaller pRFs.

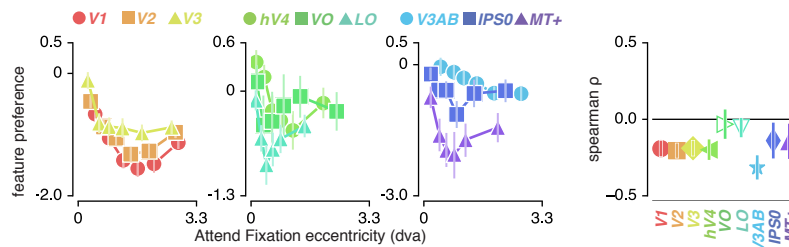

Figure 6: Feature preference and eccentricity. Preference to color compared to TF is greatest near the fovea. Errorbars denote 95% CI over voxels.

276 *Feature-based attention influences attentional gain field precision*

277 Smaller pRFs also require a more precise attentional gain field to shift a given distance  
 278 (a property of the multiplication of Gaussians). Combining this with our observation that  
 279 pRFs experience greater shifts when attending color, we predict that attentional gain fields  
 280 should be more precise in this condition. In order to test this, we repeated the attentional  
 281 gain field modeling procedure described above, replacing the *Attend Stimulus* data with  
 282 the *Attend Color* and *Attend TF* data in two separate fit procedures. Indeed, this returned  
 283 smaller fitted stimulus attentional gain field sizes in the *Attend Color* compared to the  
 284 *Attend TF* fit procedure (Figure 7 left panel) both in the *combined ROI* (0.094 dva smaller  
 285 over subjects when attending color,  $t(4) = 9.021$ ,  $p = .001$ , cohen's  $d = 4.511$ ) and across  
 286 ROIs (median over ROIs on average 0.061 dva smaller over subjects when attending color,  
 287  $t(4) = 4.243$ ,  $p = .013$ , cohen's  $d = 2.121$ ). As the *Attend Fixation* data was used as input  
 288 in both modeling procedures, we verified that the estimated fixation attentional gain field  
 289 was not different between procedures (Figure 7 right panel;  $p$ 's of .693 and .224 and cohen's  
 290  $d$  of -0.213 and -0.719 for across ROIs and *combined ROI* respectively). These analyses  
 291 show that the stronger influence of spatial attention when attending color is realized by a  
 292 more precise attentional gain field located at the stimulus. In sum, our results suggest that  
 293 (1) the attentional system adjusts its influence in accordance with the spatial sampling



294 characteristics of units that prefer the attended feature and (2) that it does this equally  
295 across visual regions regardless of their bottom-up feature preference.

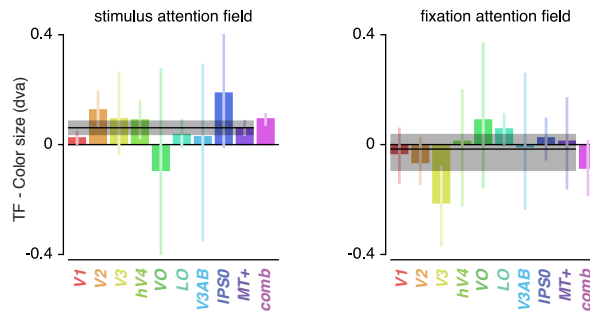

Figure 7: Feature-based attentional modulation of attentional gain field sizes. The greater effects of attention to color compared to TF are caused by more precise attentional gain fields toward the stimulus. Error bars represent 95% CI over subjects. Black horizontal lines indicates median attentional gain field size difference over ROIs, with shaded area representing 95% CI over subjects.

### 296 *Task and Fixation Performance*

297 Finally, we verified that the pRF results were not affected by differences in fixation accu-  
298 racy or behavioral performance (see Figure 8). To provide evidence in favor of these null  
299 hypothesis, we performed JZL Bayes factor analyses (using JASP; Love et al. (2015)). We  
300 rotated recorded eye position to the direction of bar movement and computed the me-  
301 dian and standard deviation of position along this dimension across bar passes per bar  
302 position (Figure 8B). We next setup a model including the factor of attention condition  
303 (3 levels), bar position (24 levels), and their interaction. We found that when predicting  
304 gaze position, the evidence was in favor of the null hypothesis with a Bayes Factor (BF)  
305 of 18620. When predicting gaze variability however, we found evidence against the null  
306 hypothesis with a BF of 5.980. Evidence for including each of the factors (condition, bar  
307 position, and their interaction) into the model returned BFs of 0.713, 547.193 and 0.017  
308 respectively. The BF of 0.713 for the factor of condition means that we cannot determine  
309 whether gaze variability was different between conditions. However, even if this would  
310 be the case, this could only lead to an offset in pRF size and not to changes in pRF posi-

311 tion (Levin et al., 2010; Klein et al., 2014; Hummer et al., 2016). As we observe a complex  
312 pattern of both pRF size and eccentricity in- and decreases, a difference in gaze variability  
313 cannot explain the attentional modulations of pRF parameters we observed. More impor-  
314 tantly, these analyses also showed that although bar position influenced gaze variability  
315 (BF of 547.193), it did not do so differently between attention conditions (BF of 0.017).  
316 Using a similar approach, we then tested whether a model including attention condition  
317 (3 levels) and stimulus eccentricity (3 levels) influenced behavioral performance (Figure  
318 8A). This returned evidence for the null hypothesis with a BF of 6.25. Together, these  
319 results show that differences in pRF parameters between conditions cannot be explained  
320 by either fixation accuracy or behavioral difficulty.

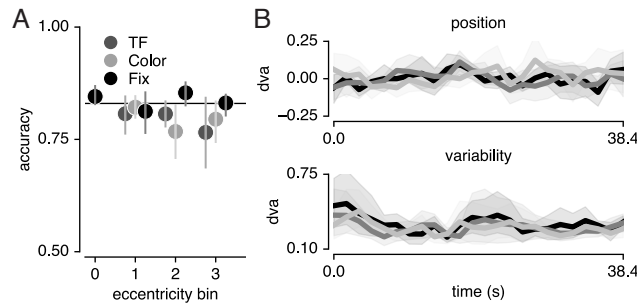

Figure 8: Task and fixation performance A. Behavioral accuracy per attention condition and per bar stimulus eccentricity bin. Horizontal line denotes Quest target of 83%; chance level was 50%. B. Median (top panel) and standard deviation (bottom panel) gaze position in the direction of bar movement per bar position. Error bars denote 95% CI across 5 participants.

## Discussion

321  
322 We investigated how spatial and feature-based attention jointly modulate the sampling  
323 of visual space. We find that directing covert spatial attention toward a moving bar stim-  
324 ulus altered the eccentricity and size of pRFs in concert. These changes in spatial sam-  
325 pling were parsimoniously explained by an attentional gain field model. Attending color  
326 changes within this stimulus induced stronger pRF changes compared to attending tem-  
327 poral frequency changes. These feature-based attentional modulations occurred globally  
328 throughout the brain, irrespective of a visual region's average feature preference. We sug-

329 gest that the greater degree of spatial resampling when attending color is related to smaller  
330 pRF sizes in relatively color preferring voxels. In addition, we show that the greater de-  
331 gree of spatial resampling when attending color is caused by a more precise attentional  
332 gain field on the stimulus.

333 The average changes in pRF size and eccentricity for each visual region are largely  
334 consistent with previous studies where attention was devoted to a peripheral stimulus  
335 versus fixation (Kay et al., 2015; Sheremata and Silver, 2015). More specifically, we sys-  
336 tematically investigated the spatial structure of the complex pattern of pRF changes that  
337 resulted from such differential spatial attention. The resulting characterization details  
338 how the sampling of visual space by single voxel pRFs is affected by spatial attention,  
339 which is of specific relevance for future studies that determine spatial selectivity for voxel  
340 selections. First, we show that attending the stimulus compared to fixation caused pRFs  
341 to shift radially. Although a previous study reported a dominant horizontal shift direc-  
342 tion (Sheremata and Silver, 2015), we suggest that the overrepresentation of the horizon-  
343 tal meridian (Schneider et al., 2004; Swisher et al., 2007) made radially shifting pRFs to  
344 appear as predominantly horizontal changes. Second, we report closely coupled pRF ec-  
345 centricity and size changes that depended on pRF eccentricity. Specifically, we found  
346 that parafoveal pRFs shifted toward the periphery and increased in size while peripheral  
347 pRFs shifted toward the fovea and decreased in size. This finding supports the resolution  
348 hypothesis of attention (Anton-Erxleben and Carrasco, 2013), which posits that spatial  
349 attention acts to reduce resolution differences between the fovea and periphery. We note  
350 that the functional implication of pRF size changes was recently questioned, as stimulus  
351 encoding fidelity was shown to be unaffected by pRF size changes (Vo et al., 2017). How-  
352 ever, the exact functional significance of changes in pRF size bears no consequence for  
353 the conclusions currently presented. Due to the strong correlation we observed between  
354 pRF eccentricity and size changes, we combined both measures into a single robust index.  
355 Our relevant quantifications are therefore agnostic to the potentially separable functional  
356 implications of changes in pRF size and eccentricity.

357 The pattern of pRF shifts we observe is well described by an attentional gain field  
358 model (Reynolds and Heeger, 2009; Klein et al., 2014). First, this highlights that a simple  
359 and well-understood mechanism underpins the apparent complexity of the observed pat-

360 tern of pRF changes. Second, it extends the utility of such attentional gain field models to  
361 situations where attention is dynamically deployed over space and time during the map-  
362 ping of the pRF (Kay et al., 2015). In agreement with earlier reports (Klein et al., 2014;  
363 Puckett and DeYoe, 2015), we found that the best-fitting model implemented comparable  
364 attentional gain field sizes across visual regions. This strongly points to spatial attention  
365 being implemented as a global influence across visual cortex. We conclude that differ-  
366 ences in pRF shift patterns between different visual regions depended primarily on differ-  
367 ences in visual sampling (i.e. differences in pRF center and size distributions) rather than  
368 on differing attentional influences. Despite the broad correspondence between model  
369 fits and data, the model did not capture the observed decreases in pRF eccentricity of the  
370 most foveal pRFs in V1. Two recent studies showed that in early visual areas, spatial at-  
371 tention shifted pRFs away from the attended location, but toward the attended location  
372 in higher visual areas (de Haas et al., 2014; Vo et al., 2017). Other studies showed that in  
373 precisely these visual regions, both the pRF and the attentional gain field are composed of  
374 a suppressive surround in addition to their positive peak (Zuiderbaan et al., 2012; Puck-  
375 ett and DeYoe, 2015). We leave the question whether these suppressive surrounds could  
376 explain such repulsive shifts in lower visual cortex for future research. As a more general  
377 aside, gain fields have been shown to influence visual processing at the motor stage (van  
378 Opstal et al., 1995; Snyder et al., 1998; Trotter and Celebrini, 1999). Thus, our results  
379 further establish the close link between attentional and motor processes (Rizzolatti et al.,  
380 1987; Corbetta et al., 1998).

381 Of particular interest, we showed that the changes in visual space induced by spa-  
382 tial attention were stronger when attending color compared to when attending temporal  
383 frequency. This occurred throughout the brain, irrespective of visual regions' preference  
384 for the attended features. In other words, while MT+ and V4 differed greatly in their  
385 relative feature preference, both areas showed comparable pRF changes resulting from  
386 differences in feature-based attention. This stands in apparent contrast with previous  
387 studies reporting that feature-based attention selectively enhances responses in cortical  
388 areas specialized in processing the attended feature (Corbetta et al., 1990; Chawla et al.,  
389 1999; O'Craven et al., 1999; Schoenfeld et al., 2007; Baldauf and Desimone, 2014). How-  
390 ever, attending a stimulus consisting multiple features was shown to spread attentional

391 response modulations of one of the object's feature dimensions to other constituent fea-  
392 ture dimensions (Katzner et al., 2009; Çukur et al., 2013; Kay and Yeatman, 2017), albeit  
393 somewhat later in time (+/- 60ms; Schoenfeld et al., 2014). This could mean that the  
394 global pattern of pRF shifts we observed is caused by such an object-based attentional  
395 transfer mechanism. In addition, changing the sampling of visual space globally through-  
396 out the brain enhances stability in the representation of space. Different modifications  
397 of visual space per visual region would require an additional mechanism linking differ-  
398 ent spatial representations. Instead, the global nature of spatial resampling we observe  
399 supports a temporally dynamic but spatially consistent adaptation of visual space.

400 The greater degree of spatial resampling when attending color can be explained by  
401 differences in spatial sampling in voxels that prefer color compared to temporal fre-  
402 quency. Behavioral studies have suggested that feature-based attention should modulate  
403 the strength of spatial resampling in order to improve sampling of attended features  
404 (Yeshurun et al., 2008; Barbot and Carrasco, 2017). One of the factors that determines  
405 the required degree of spatial resampling is receptive field size. Specifically, smaller pRFs  
406 need to shift a greater distance in order to bring a stimulus into their responsive region.  
407 Both our data and previous findings show that pRF size (Dumoulin and Wandell, 2008)  
408 and color compared to temporal frequency preference (Curcio et al., 1990; Azzopardi  
409 et al., 1999; Brewer et al., 2005) vary across eccentricity such that foveal voxels have  
410 smaller pRFs and are more color sensitive. This means that color is sampled by smaller  
411 pRFs than temporal frequency. Attending color in the stimulus therefore required a  
412 greater degree of spatial resampling in order to optimally sample the attended feature. In  
413 addition, gain field models of attention predict that smaller pRFs require a more precise  
414 attentional gain field in order to shift a given distance. Indeed, our results showed that  
415 attending color versus temporal frequency resulted in more precise attentional gain fields  
416 directed toward the bar stimulus. Together, this shows that the larger degree of spatial  
417 resampling we observed when attending color can be parsimoniously explained by  
418 smaller pRF size in voxels that prefer color over temporal frequency. Yet, as pRF size is so  
419 strongly related to pRF eccentricity, we can not exclude an influence of pRF eccentricity  
420 above and beyond pRF size. However, receptive field size is suggested to be crucial in  
421 the eccentricity dependence of attentional influences observed in behavior (Yeshurun

422 and Carrasco, 1998, 1999; Anton-Erxleben and Carrasco, 2013). Therefore, although  
423 differential influences of attention across eccentricities have been observed before in  
424 the brain (e.g. Roberts et al., 2007; Bressler et al., 2013), these are likely brought about  
425 by differences in pRF size. In sum, our results confirm the notion that the endogenous  
426 attentional system is able to take into account the spatial sampling properties of units that  
427 prefer the attended feature, and that it adjusts the strength of its influence accordingly  
428 (Yeshurun et al., 2008; Barbot and Carrasco, 2017).

429       Electrophysiological studies on the interaction between feature-based and spatial at-  
430 tention generally measure overall response amplitudes instead of changes in spatial sam-  
431 pling. This showed that interactions between feature-based and spatial attention are weak  
432 to non-existent in relatively early stages of processing (David et al., 2008; Hayden and Gal-  
433 lant, 2009; Patzwahl and Treue, 2009; Zhang and Luck, 2009), but develop at later stages  
434 of visual processing (Hillyard and Munte, 1984; Handy et al., 2001; Andersen et al., 2011;  
435 Bengson et al., 2012; Ibos and Freedman, 2016, but see Egnér et al. (2008)). We add to  
436 this (1) that feature-based attention modulates the effects of spatial attention on spatial re-  
437 sampling and (2) that these interactions occur globally throughout the brain, manifesting  
438 themselves even in the earliest cortical visual regions. Interactions between spatial and  
439 feature-based attention in early stages of processing could be concealed when focusing  
440 on changes in response amplitude instead of changes in spatial sampling. However, it is  
441 important to note that measuring spatial sampling at the level of voxels does not allow us  
442 to determine whether observed changes in spatial sampling are due to changes in spatial  
443 sampling of individual neurons, or rather due to differential weighting of subpopulations  
444 of neurons within a voxel. Nevertheless, it has been shown that spatial attention does  
445 influence spatial sampling of individual neurons (Connor et al., 1997; Womelsdorf et al.,  
446 2006). Yet, future studies are required to extend our conclusions regarding the interac-  
447 tions between feature-based and spatial attention to the single neuron level.

448       Another important remaining question pertains to the source of the interactions be-  
449 tween feature-based and spatial attention. Signals of spatial selection are thought to orig-  
450 inate from a network of frontal and parietal areas, identified using fMRI (Shulman, 2002;  
451 Silver et al., 2005; Jerde et al., 2012; Sprague and Serences, 2013; Szczepanski et al., 2013;  
452 Kay and Yeatman, 2017; Mackey et al., 2017), and electrophysiology (Moore and Arm-

453 strong, 2003; Gregoriou et al., 2009). As we focused on careful measurement of spatial  
454 sampling in feature sensitive visual cortex with a relatively small stimulus region, we did  
455 not include the frontoparietal regions containing large receptive fields into our analyses.  
456 A recent study suggested a central role for the ventral prearcuate gyrus for conjoined  
457 spatial and feature-based attentional modulations (Bichot et al., 2015). Correspondingly,  
458 signals of feature selection in humans have been localized to a likely human homologue  
459 of this area, the inferior frontal junction (IFJ; Zanto et al., 2010; Baldauf and Desimone,  
460 2014). This region is therefore a possible candidate for controlling the interactions be-  
461 tween feature-based and spatial attention.

462 In sum, we show that visuospatial sampling is not only affected by attended locations  
463 but also depends on the spatial sampling properties of units that prefer attended visual  
464 features. The global nature of these modulations highlights the flexibility of the brain's  
465 encoding of sensory information in order to meet task demands (Rosenholtz, 2016).

## 466 *Materials and Methods*

### 467 *Participants*

468 Five participants (2 female, 2 authors, aged between 25 - 37) participated in the study.  
469 All gave informed consent, and procedures were approved by the ethical review board of  
470 the University of Amsterdam, where scanning took place.

### 471 *Apparatus*

#### 472 *MRI acquisition*

473 All MRI data was acquired on a Philips Achieva 3T scanner (Philips Medical Systems),  
474 equipped with a 32-channel head coil. T1 weighted images were acquired for each par-  
475 ticipant with isotropic resolution of 1 mm<sup>3</sup>, repetition time (TR) of 8000 ms, TE of 3.73  
476 ms, flip angle of 8°. Functional T2\* weighted data consisted of 30 2D slices of echo pla-  
477 nar images (EPI) with isotropic resolution of 2.5 mm<sup>2</sup>, with a 0.25 mm slice gap, TR of  
478 1600 ms, TE of 27.62 ms, and a flip angle of 70°. Each participant completed between  
479 6 to 8 Attention-pRF Mapping runs (20 min each) and 2-3 Feature preference and HRF

480 Mapping runs (10 min each), spread over 2 (N = 1) or 3 (N = 4) sessions within a 2 week  
481 period (see Experimental Design).

#### 482 *Gaze recording*

483 During all functional runs, gaze position was recorded using an Eyelink 1000 (SR Re-  
484 search, Osgoode, Ontario, Canada), sampled at 1000 Hz. A 9-point calibration-validation  
485 procedure was run at the start of each session.

#### 486 *Stimulus presentation*

487 Visual stimuli were created in PsychoPy (Peirce, 2008) and run on a 15 inch 2013 Mac-  
488 Book Pro Retina. Participants viewed a 32 inch BOLD screen (resolution: 1920 x 1080,  
489 refresh rate: 100 Hz; Cambridge Research Systems), at 156 cm distance of the partici-  
490 pants' eyes at the end of the bore, via a helmet-mounted front-silvered mirror. Auditory  
491 stimuli were presented through headphones using the MRConfon system.

### 492 *Experimental Design*

#### 493 *Attention-PRF Mapping Stimulus*

494 A bar stimulus of 0.9 degrees of visual angle (dva) width traversed a circular aperture  
495 of 7.2 dva in one of eight directions (cardinal and diagonal orientations in both direc-  
496 tions, see Figure 9A), completing a full pass in 38.4 s by stepping 0.34 dva every 1.6 s, and  
497 pausing 4.8 s between each bar pass. One run contained 24 bar passes in total (3 for every  
498 direction), plus four blank periods of 38.4 s when no bar stimulus was shown. Through-  
499 out the experiment, a gray disk of 9.6 arcmin (60 cd/m<sup>2</sup>), with a 4.2 arcmin black rim (0  
500 cd/m<sup>2</sup>) was present on the screen as a fixation mark. The bar stimulus was composed of  
501 1500 Gabor elements (4.34 cycle/dva spatial frequency, 9 arcmin sd, average luminance  
502 of 60 cd/m<sup>2</sup>) projected over a dark-gray background (15 cd/m<sup>2</sup>). Three times per bar  
503 location (i.e. every 533 ms), Gabor element parameters were updated to a new random  
504 location (uniformly distributed over the spatial extent of the bar at full width), a random  
505 orientation (uniformly drawn between 0 - 360°), a random color combination (either  
506 blue-yellow (BY), or cyan-magenta (CM)) and a random new temporal frequency (TF;  
507 either high or low). The high and low temporal frequencies were chosen per participant



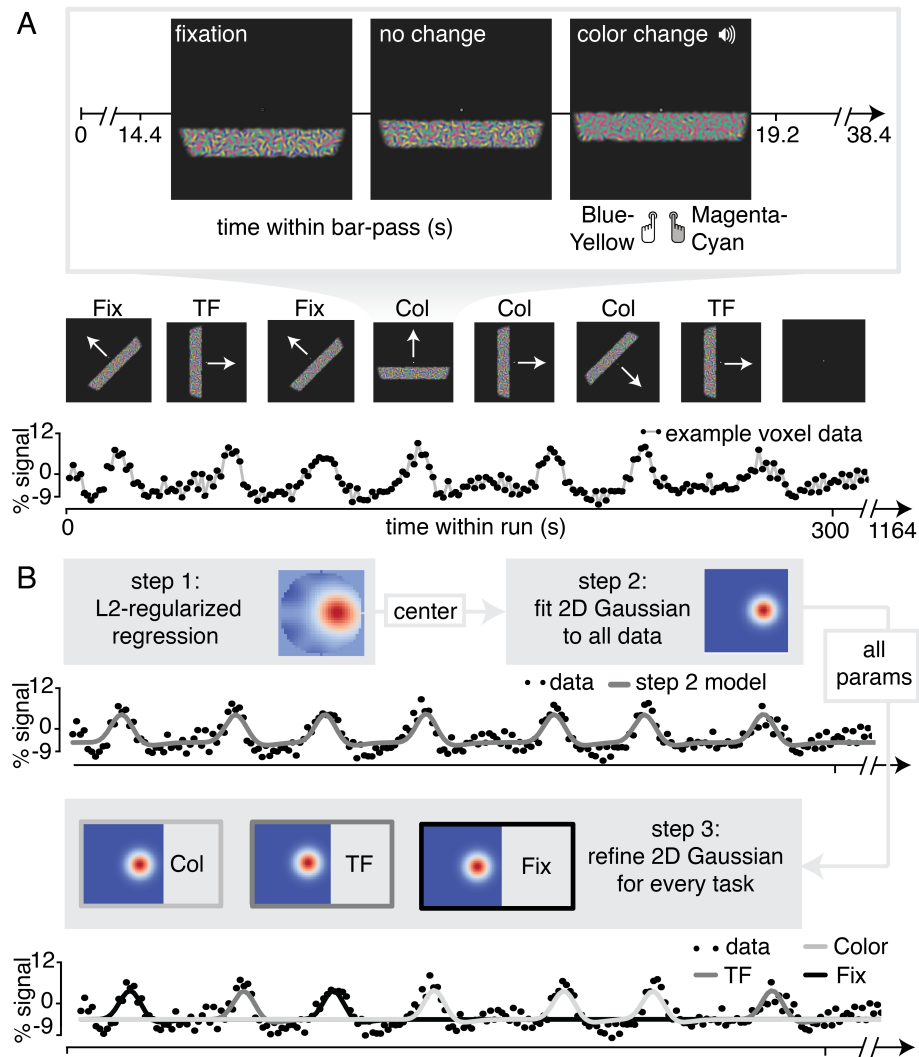

Figure 9: Experimental Design and pRF Fitting procedure. A. Experimental Design. Throughout a bar pass participants reported either changes in color (*Attend Color*) or temporal frequency (*Attend TF*) of Gabor elements within the moving bar stimulus, or changes in fixation mark luminance (*Attend Fixation*), while maintaining accurate fixation. Participants were informed auditorily about the upcoming task 2 s before each bar pass. B. Overview of pRF fitting procedure. pRF parameters were estimated from each voxel's BOLD signal time course in a three step procedure. First, a design matrix was constructed based on 31x31 pixels' visual stimulation time course of the entire experiment, which was convolved with a participant-specific HRF (derived from separate data, see *Feature preference and HRF Mapper*). L2-regularized regression was used to find the position of the spatial response profile's peak of each voxel. Second, to find precise estimates of pRF center location and size we used a more finegrained 101x101 design matrix and gradient descent to fit a single parameterized 2D Gaussian pRF model to data from all attention conditions combined, initialized at the L2-regression derived peak location. Third, 2D Gaussian pRF models were fitted to data from the different attention conditions separately, initialized with the parameters resulting from step 2.

508 to facilitate their ability to distinguish TF changes (6 and 4 Hz in 3 participants, 7 and 3  
509 Hz in 2 participants). The overall color and/or TF composition of the bar was transiently  
510 altered on some of these parameter updates, by changing the ratio of Gabor elements  
511 assigned either color combination or either TF (as targets for the behavioral tasks, see  
512 below). The temporal predictability of these events was minimized by randomly drawing  
513 occurrences according to an exponential distribution (mean 4 s, minimum 2 s). Addition-  
514 ally, the fixation mark central disk luminance either increased or decreased, with proba-  
515 bility and duration of these occurrences identical to those of changes in the bar stimulus  
516 composition. These three types of transients (fixation mark luminance, bar color and TF  
517 composition) were independent, meaning they were randomly interleaved and could be  
518 combined on the screen. Importantly, this design ensured that physical stimulation was  
519 equated across all three attention conditions, which we describe below.

#### 520 *Attention-PRF Mapping Task*

521 For an overview of the stimulus and behavioral task, see Figure 9A. Before each bar  
522 pass an automated voice (Apple OSX Dictation voice ‘Kathy’) informed participants to  
523 perform a 2-alternative forced-choice task (2AFC) on one of the three stimulus parameter  
524 deviations. Task-relevant visual stimulus changes were accompanied by an auditory pure  
525 tone (440 Hz). This auditory cue alerted the participant to respond, while task-irrelevant  
526 stimulus changes occurred independently and without warning tone. This ensured that  
527 all task-related information was conveyed to the participant by auditory means, with-  
528 out concurrent changes in visual stimulation. The different stimulus changes (i.e. color,  
529 TF and fixation luminance) occurred independently and thus sometimes simultaneously,  
530 rendering the auditory tone not reliably predictive of the stimulus dimension to attend.  
531 Therefore, participants needed to stably maintain condition-specific top-down attention  
532 throughout the duration of a bar pass. In the *Attend Color* condition, participants judged  
533 the relative predominance of Blue-Yellow or Cyan-Magenta Gabor elements in the bar  
534 stimulus, while in the *Attend TF* condition, participants judged the relative predominance  
535 of high compared to low TF Gabor elements in the bar stimulus. We chose color and TF  
536 as these features are known to be processed markedly differently in the visual system.  
537 While color is preferentially processed by the ventral visual areas V4 and VO, temporal

538 information is known to be processed preferentially by area MT+ (Liu and Wandell, 2005;  
539 Brouwer and Heeger, 2009, 2013). We specifically chose TF and not coherent motion, as  
540 coherent motion signals have been shown to influence pRF measurements (Harvey and  
541 Dumoulin, 2016). Both color and TF have been shown to be able to capture attention  
542 (Wolfe and Horowitz, 2004; Cass et al., 2011). In the *Attend Fixation* condition, partici-  
543 pants judged whether the central disk of the fixation mark increased or decreased in lumi-  
544 nance. The magnitude of the stimulus changes was titrated by means of a Quest staircase  
545 procedure (Watson and Pelli, 1983), set to approximate 83% correct performance. In or-  
546 der to equate task difficulty across not only conditions but also bar stimulus eccentricity,  
547 we used separate Quest staircases at three different bar stimulus eccentricities in each of  
548 the attention conditions. Additionally, there was a separate staircase for the *Attend Fixa-*  
549 *tion* task when no bar stimulus on screen. This made for a total of 10 separate staircases  
550 during the experiment. Participants extensively practiced the task outside the scanner  
551 and staircases were reset before scanning. Each experimental run contained one bar pass  
552 per task condition, per direction, in random order (total of 24 bar passes per run).

### 553 *Feature preference and HRF Mapper*

554 We performed a separate randomized fast event-related fMRI experiment in order to  
555 (1) determine each voxels' relative preference for color and TF, and (2) to find the pa-  
556 rameters that best described each participants' HRF, to be used in the pRF estimation  
557 procedure (see below). Full-field stimuli consisted of 8000 Gabor elements, uniformly  
558 distributed throughout the full circular aperture traversed by the pRF mapping stimulus  
559 ensuring identical density compared to the pRF mapping stimulus. Also, every 533 ms,  
560 all Gabor elements were assigned a new random orientation and location. These stimuli  
561 were presented for 3.2 s, with an inter-trial interval of 3.2 s. In a full factorial 2 x 2 de-  
562 sign, we varied the color and TF content of the stimulus in an on-off fashion. That is, the  
563 TF of the Gabor elements was either 0 or 7 Hz, and the elements were either grayscale  
564 or colored (balanced BY/CM). Trial order was determined based on an M-sequence (Bu-  
565 račas and Boynton, 2002), with no-stimulus (null) trials interspersed as a fifth category  
566 of trials. During this experiment, participants performed the same 2-AFC fixation-point  
567 luminance task as in the Attention-pRF Mapping Task (*Attend Fixation*), using a separate

568 staircase. A single HRF was determined per participant using the R1-GLM approach (Pe-  
569 dregosa et al., 2015), on data from all conditions. The median HRF from the 1000 most  
570 responsive voxels (highest beta-weights in the colored high TF condition) was used as the  
571 participant specific HRF.

## 572 *Data analysis*

### 573 *MRI Preprocessing*

574 T1-weighted images were first segmented automatically using Freesurfer, after which  
575 the pial and grey/white matter surfaces were hand-edited. Regions of interest (ROIs) were  
576 defined on surface projected retinotopic maps using Freesurfer without the use of spatial  
577 smoothing. For every participant, one session's EPI image was selected as the target EPI,  
578 which was registered to his/her Freesurfer segmented T1-weighted image using the bbg-  
579 ister utility, after which the registration was hand-adjusted. Then, all EPI images were first  
580 motion corrected to their middle volume using FSL (Jenkinson et al., 2012) MCFLIRT to  
581 correct for within run motion. Then, all EPI images were registered both linearly (using  
582 FLIRT) and non-linearly (using FNIRT) to the mean-motion corrected target EPI to cor-  
583 rect for between run and session motion and inhomogeneities in B0 field. Low frequency  
584 drifts were removed using a 3rd order savitzky-golay filter (Savitzky and Golay, 1964)  
585 with a window length of 120s. Arbitrary BOLD units were converted to percent-signal  
586 change on a per-run basis.

### 587 *pRF fitting procedure*

588 pRF fitting and (statistical) parameter processing was performed using custom-  
589 written python pipeline available at [https://github.com/daanvanes/pRF\\_attention\\_](https://github.com/daanvanes/pRF_attention_analyses)  
590 [analyses](https://github.com/daanvanes/pRF_attention_analyses). Links to the data files required to reproduce the figures and analyses can be  
591 found in the readme of this repository. The fitting routines heavily relied on the scipy and  
592 numpy packages. We approximated the pRF by a two-dimensional isotropic Gaussian  
593 function. For an overview of our pRF fitting procedure, see Figure 9B. A predicted  
594 timecourse for a given Gaussian function can be created by first computing the overlap  
595 of this function with a model of the stimulus for each timepoint, and then convolving  
596 this overlap with the participant-specific HRF (Dumoulin and Wandell, 2008). It is

597 possible to find these Gaussian parameter estimates using a minimization algorithm,  
598 but such an approach is at risk of missing the global optimum when parameters are  
599 not initialized at appropriate values. Recently, a model-free reverse-correlation-like  
600 method was developed, generating a pRF spatial profile without requiring any pre-set  
601 parameters (for details see Lee et al. (2013)). Briefly, we employed this method using L2  
602 regularized (Ridge) regression on a participant-specific-HRF convolved design matrix  
603 coding the stimulus position in a 31x31 grid for each timepoint, predicting data from all  
604 attention conditions together. Using a high regularisation parameter ( $\lambda = 10^6$ ), we used  
605 this procedure not to maximize explained signal variance, but to robustly determine  
606 the pRF center, which was defined as the position of the maximum weight. Having  
607 determined these approximate initial values for the pRF center, we next initialized  
608 a minimization procedure (Powell (1964) algorithm) at these location values, fitting  
609 position ( $x, y$ ), size, baseline and amplitude parameters of an isotropic 2D Gaussian to  
610 data from all conditions together using a design matrix with size 101x101 for enhanced  
611 precision. Then, all resulting Gaussian parameters were used to initialize a second  
612 minimization procedure which fitted a Gaussian for each attention condition separately  
613 at the same time (all parameters independent except for one shared baseline parameter).  
614 This approach allowed us to recover fine-grained differences in pRF parameters under  
615 conditions of differential attention.

#### 616 *pRF selection*

617 We discarded pRFs that were either at the edge of the stimulus region (above 3.3 dva  
618 in the *Attend Fixation* condition), or had size (standard deviation) larger than our stim-  
619 ulus diameter (7.2 dva) in any of the tasks. Additionally, each voxel's contribution to all  
620 analyses was weighted according to the quality of fit of the pRF model, which was defined  
621 as 1 minus the ratio of residual to observed variance:

$$R^2 = 1 - \frac{\sum_i (m_i - p_i)^2}{\sum_i (m_i - \bar{m}_i)^2} \quad (1)$$

622 where  $i$ ,  $m$  and  $p$  refer to voxel index, measured BOLD time-course and predicted  
623 time-course respectively. We disregarded voxels with an  $R^2 < .1$ .

624 *pRF parameter analyses*

625 The statistical approach used to combine pRF results across participants was similar  
626 to that of two recent and comparable studies (Klein et al., 2014; Kay et al., 2015), that  
627 adopted a ‘dense sampling of individual brain approach’ (Poldrack, 2017). This approach  
628 favours careful measurement of individual brains at the expense of large sample sizes in  
629 terms of the number of subjects. After defining visual ROIs per participant using standard  
630 retinotopic mapping procedures (Dumoulin and Wandell, 2008), this entailed pooling  
631 voxels for each ROI across participants. Statistics are then computed over this collection  
632 of voxels, much akin to the way in which neurons are often pooled across monkeys. In  
633 order to provide additional estimates of stability across participants, we also performed all  
634 analyses for each participant separately, the results of which can be found in the Statistical  
635 Appendix.

636 Except for the Rayleigh tests (Supplementary Table 2) p-values and confidence inter-  
637 vals were computed using  $10^5$  fold bootstrap procedures. To test whether bootstrapped  
638 distributions differed from a certain threshold, p-values were defined as the ratio of boot-  
639 strap samples below versus above that threshold multiplied by 2 (all reported p-values  
640 are two-tailed). In order to provide maximally robust estimates of central tendency and  
641 variance of parameter estimates, we excluded outliers using a threshold of five two-sided  
642 median absolute deviations. As this outlier rejection was performed for each analysis  
643 separately, this resulted in slightly different number of voxels included in each analysis  
644 (see Ns in statistics tables). Outlier rejection was performed either per visual field bin  
645 (cf. Figure 1B, 2B/D, 3A/B, 4A/B/D/E/F, 5A/B, scatters in Figure 6), per percentile bin  
646 (cf. Figure 3C), or per ROI (cf. Figures 2C, 5D/E). When analyses are performed across  
647 participants outliers were again rejected at the voxel level per participant, but all partici-  
648 pants were always included (cf. 4A/B/C/D/E/F and 7). When comparing correlations to  
649 0, correlations were Fisher transformed using the inverse hyperbolic tangent function.

650 *Feature attention modulation index*

651 We computed a per-voxel index to quantify how strongly feature-based attention  
652 modulated the effects of spatial attention on spatial sampling (feature-based attention  
653 modulation index, or feature AMI). This measure combined pRF eccentricity and size

654 parameters, as our results showed that spatial attention affected these parameters in con-  
655 cert (see Figure 3). Per voxel and per attention condition to the bar stimulus, (*Attend*  
656 *Color* and *Attend TF*) we set up a two-dimensional vector containing difference in pRF  
657 eccentricity and size relative to the *Attend Fixation* condition. pRF size and eccentricity  
658 differences were normalized respective to their variance in the *Attend Stimulus* condition  
659 to ensure that both measure contributed equally to the feature AMI. We then computed a  
660 feature AMI by dividing the difference between the norms of these vectors by their sum.  
661 This way, positive values of feature AMI indicate greater spatial attention effects on pRF  
662 parameters in the *Attend Color* condition than in the *Attend TF* condition and vice versa.  
663 Note that this measure abstracted out both the affected pRF parameter (i.e. eccentricity  
664 and size) and the sign of these changes (i.e. shifts toward the fovea or periphery and in-  
665 creases or decreases in size).

#### 666 *Attentional Gain Field modeling*

667 To provide a parsimonious mechanistic account for how attention to the moving bar  
668 stimulus changed pRF position, we adapted an existing attentional gain model of atten-  
669 tion (Womelsdorf et al., 2008; Reynolds and Heeger, 2009; Klein et al., 2014). This model  
670 conceptualizes the measured Gaussian pRF as the multiplication between a Gaussian  
671 stimulus-driven pRF (*SD*, i.e. the pRF outside the influence of attention), and a Gaussian  
672 attentional gain field (*AF*). Following the properties of Gaussian multiplication, the nar-  
673 rower the *AF* the stronger the influence on the *SD*, and the narrower the *SD* the smaller  
674 the resulting shift. An overview of model mechanics is shown in Figure 10. We estimated  
675 the *SD* by dividing the measured *Attend Fixation* pRF by an *AF* at fixation ( $AF_{fix}$ , Figure  
676 10A). As attention to the stimulus shifted the locus of attention as the bar moved across  
677 the screen, we modeled the effect of attention for each bar stimulus position separately  
678 (Figure 10B). Each unique bar stimulus (24 bar positions for each of 8 directions) was  
679 convolved with a Gaussian kernel ( $AF_{stim}$ ) and multiplied with the estimated *SD*. This  
680 yielded one predicted pRF per bar position. These predicted pRFs were then scaled to a  
681 maximum of 1 and averaged over the different bar positions. This averaged profile essen-  
682 tially represented the pRF ‘smeared’ across visual space as spatial attention moved along  
683 with the bar stimulus throughout the recording. The peak of this averaged profile was

684 then designated as the predicted pRF center location in the *Attend Stimulus* condition  
685 (Figure 10C). Thus, the modeling procedure consisted of two separate AFs, one at fixa-  
686 tion ( $AF_{fix}$ ) and one convolved with the bar stimulus ( $AF_{stim}$ ), which were estimated at  
687 the same time. The input to the model was the *Attend Fixation* pRF, and the output was  
688 the predicted position for the *Attend Stimulus* pRF. Formally, this is given by:

$$pRF_{stimpos} = argmax \left( \frac{1}{n} \cdot \sum_{t=0}^n \left( \frac{(dm_{(t)} * AF_{stim}) \cdot (pRF_{fix}/AF_{fix})}{max((dm_{(t)} * AF_{stim}) \cdot (pRF_{fix}/AF_{fix}))} \right) \right) \quad (2)$$

689 where  $(dm_{(t)} * AF_{stim})$  represents the stimulus design matrix at timepoint  $t$  convolved  
690 with the AF toward the stimulus,  $(pRF_{fix}/AF_{fix})$  represents the estimation of the SD, and  
691 the denominator ensures scaling to a maximum of 1. To estimate how well a set of AF pa-  
692 rameters fit the data across the entire visual field, we minimized the L2 distance between  
693 the predicted and measured *Attend Stimulus* pRF positions of the 64 vectors derived from  
694 the quadrant visual field format of Figure 2B. AF sizes were determined at an ROI level,  
695 thus assuming that attention influenced all pRFs within an ROI similarly, while possibly  
696 varying between ROIs. The model was evaluated for a 50 x 50 evenly spaced grid of AF  
697 sizes, where the AF at fixation varied between 1.5-2.5 dva, and the AF convolved with the  
698 stimulus varied between 0.6-1.6 dva (i.e. 0.02 dva precision). The convolution between  
699 the stimulus and the  $AF_{stim}$  resulted in effective AF size to be 0.9 (bar stimulus width)  
700 larger than the  $AF_{stim}$  itself. These parameter ranges therefore result in equal effective AF  
701 sizes. Reported sizes are the standard deviation of the 2D Gaussians, with 0.9 (the bar  
702 width) added to  $AF_{stim}$  sizes. Modeling was performed for each participant separately.

### 703 *Gaze data processing*

704 Gaze data was cleaned by linearly interpolating blinks detected by the EyeLink soft-  
705 ware. Transient occasions in which the tracker lost the pupil due to partial occlusion by  
706 the eyelid leading to high-frequency, high-amplitude signal components were detected  
707 and corrected as follows. Pupil size was first high-pass filtered at 10 Hz (the pupil im-  
708 pulse response function is a low-pass filter with a cutoff below 10 Hz (Knapen et al., 2016;  
709 Korn and Bach, 2016)), after which those time-points in which the acceleration of pupil



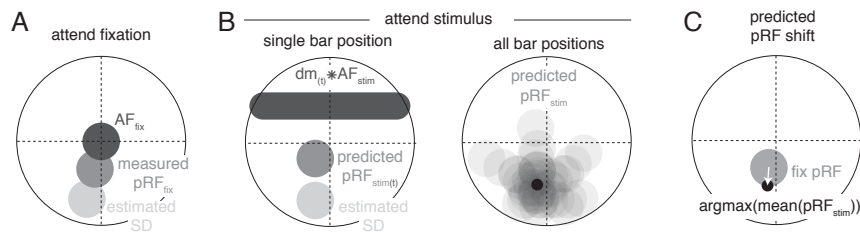

Figure 10: Schematic overview of modeling procedure. A. The Stimulus Drive (SD) was estimated by dividing the measured Attend Fixation pRF by an AF at fixation ( $AF_{fix}$ ). B. Attention toward the bar stimulus at a given timepoint  $t$  was modeled as the multiplication of the estimated SD with the bar stimulus at that timepoint ( $dm_{(t)}$ ) convolved with another AF ( $AF_{stim}$ ). These predicted Attend Stimulus pRFs were averaged over all timepoints. The maximum position of this profile was taken as the predicted Attend Stimulus pRF position. C. The predicted pRF shift ran from the measured Attend Fixation pRF toward the predicted Attend Stimulus position.

710 size was greater than  $10^5$  mm/s, and their neighbours within 5 s, were replaced with NaN  
 711 values. Drift correction was performed within each bar-pass by subtracting the median  
 712 gaze position. All gaze positions were rotated to the direction of bar movement, after  
 713 which we analyzed the median and variance (standard deviation) of the component in  
 714 the direction of bar movement (i.e. the component relevant for the pRF measurement).

## References

- 715
- 716 Andersen SK, Fuchs S, Mueller MM (2011) Effects of feature-selective and spatial atten-  
 717 tion at different stages of visual processing. *J Cognitive Neurosci* 23:238–246.
- 718 Anton-Erxleben K, Carrasco M (2013) Attentional enhancement of spatial resolution:  
 719 linking behavioural and neurophysiological evidence. *Nat Rev Neurosci* 14:188–200.
- 720 Azzopardi P, Jones KE, Cowey A (1999) Uneven mapping of magnocellular and parvo-  
 721 cellular projections from the lateral geniculate nucleus to the striate cortex in the macaque  
 722 monkey. *Vision Res* 39:2179–2189.
- 723 Baldauf D, Desimone R (2014) Neural mechanisms of object-based attention. *Science*  
 724 344:424–427.
- 725 Barbot A, Carrasco M (2017) Attention modifies spatial resolution according to task

726 demands. *Psychol Sci* 28:285–296.

727 Bengson JJ, Lopez-Calderon J, Mangun GR (2012) The spotlight of attention illumi-  
728 nates failed feature-based expectancies. *Psychophysiology* 49:1101–1108.

729 Bichot NP, Heard MT, DeGennaro EM, Desimone R (2015) A source for feature-based  
730 attention in the prefrontal cortex. *Neuron* 88:832–844.

731 Bressler DW, Fortenbaugh FC, Robertson LC, Silver MA (2013) Visual spatial atten-  
732 tion enhances the amplitude of positive and negative fMRI responses to visual stimulation  
733 in an eccentricity-dependent manner. *Vision Res* 85:104–112.

734 Brewer AA, Liu J, Wade AR, Wandell BA (2005) Visual field maps and stimulus selec-  
735 tivity in human ventral occipital cortex. *Nat Neurosci* 8:1102–1109.

736 Brouwer GJ, Heeger DJ (2009) Decoding and reconstructing color from responses in  
737 human visual cortex. *J Neurosci* 29:13992–14003.

738 Brouwer GJ, Heeger DJ (2013) Categorical clustering of the neural representation of  
739 color. *J Neurosci* 33:15454–15465.

740 Buračas GT, Boynton GM (2002) Efficient design of event-related fMRI experiments  
741 using M-sequences. *NeuroImage* 16:801–813.

742 Burnett KE, Close AC, d’Avossa G, Sapir A (2016) Spatial attention can be biased  
743 towards an expected dimension. *Q J Exp Psychol* 69:2218–2232.

744 Carrasco M, Yeshurun Y (1998) The contribution of covert attention to the set-size  
745 and eccentricity effects in visual search. *J Exp Psychol Human* 24:673–692.

746 Cass J, van der Burg E, Alais D (2011) Finding flicker: critical differences in temporal  
747 frequency capture attention. *Front Psychol* 2:320.

748 Cepeda NJ, Cave KR, Bichot NP, Kim MS (1998) Spatial selection via feature-driven  
749 inhibition of distractor locations. *Percept Psychophys* 60:727–746.

750 Chawla D, Rees G, Friston KJ (1999) The physiological basis of attentional modulation  
751 in extrastriate visual areas. *Nat Neurosci* 2:671–676.

752 Cohen A, Shoup R (1997) Perceptual dimensional constraints in response selection  
753 processes. *Cogn Psychol* 32:128–181.

754 Cohen MR, Maunsell JHR (2011) Using neuronal populations to study the mecha-  
755 nisms underlying spatial and feature attention. *Neuron* 70:1192–1204.

756 Connor CE, Preddie DC, Gallant JL, Van Essen DC (1997) Spatial attention effects in

- 757 macaque area V4. *J Neurosci* 17:3201–3214.
- 758 Corbetta M, Akbudak E, Conturo TE, Snyder AZ, Ollinger JM, Drury HA, Linenwe-  
759 ber MR, Petersen SE, Raichle ME, Van Essen DC, Shulman GL (1998) A common network  
760 of functional areas for attention and eye movements. *Neuron* 21:761–773.
- 761 Corbetta M, Miezin FM, Dobmeyer S, Shulman GL, Petersen SE (1990) Attentional  
762 modulation of neural processing of shape, color, and velocity in humans. *Science*  
763 248:1556–1559.
- 764 Curcio CA, Sloan KR, Kalina RE, Hendrickson AE (1990) Human photoreceptor to-  
765 pography. *J Comp Neurol* 292:497–523.
- 766 Çukur T, Nishimoto S, Huth AG, Gallant JL (2013) Attention during natural vision  
767 warps semantic representation across the human brain. *Nat Neurosci* 16:763–770.
- 768 Datta R, DeYoe EA (2009) I know where you are secretly attending! The topography  
769 of human visual attention revealed with fMRI. *Vision Res* 49:1037–1044.
- 770 David SV, Hayden BY, Mazer JA, Gallant JL (2008) Attention to stimulus features shifts  
771 spectral tuning of V4 neurons during natural vision. *Neuron* 59:509–521.
- 772 de Haas B, Schwarzkopf DS, Anderson EJ, Rees G (2014) Perceptual load affects spatial  
773 tuning of neuronal populations in human early visual cortex. *Curr Biol* 24:R66–7.
- 774 Dumoulin SO, Knapen T (2018) How visual cortical organization is altered by oph-  
775 thalmologic and neurologic disorders. *Annu Rev Vis Sci*. In press.
- 776 Dumoulin SO, Wandell BA (2008) Population receptive field estimates in human vi-  
777 sual cortex. *NeuroImage* 39:647–660.
- 778 Egner T, Monti JMP, Trittschuh EH, Wieneke CA, Hirsch J, Mesulam MM (2008)  
779 Neural integration of top-down spatial and feature-based information in visual search. *J*  
780 *Neurosci* 28:6141–6151.
- 781 Found A, Müller HJ (1996) Searching for unknown feature targets on more than one  
782 dimension: Investigating a dimension-weighting account. *Percept Psychophys* 58:88–  
783 101.
- 784 Gregoriou GG, Gotts SJ, Zhou H, Desimone R (2009) High-frequency, long-range  
785 coupling between prefrontal and visual cortex during attention. *Science* 324:1207–1210.
- 786 Handy TC, Green V, Klein RM, Mangun GR (2001) Combined expectancies: event-  
787 related potentials reveal the early benefits of spatial attention that are obscured by reaction

- 788 time measures. *J Exp Psychol Human* 27:303–317.
- 789 Harvey BM, Dumoulin SO (2016) Visual motion transforms visual space representa-  
790 tions similarly throughout the human visual hierarchy. *NeuroImage* 127:173–185.
- 791 Hayden BY, Gallant JL (2005) Time course of attention reveals different mechanisms  
792 for spatial and feature-based attention in area V4. *Neuron* 47:637–643.
- 793 Hayden BY, Gallant JL (2009) Combined effects of spatial and feature-based attention  
794 on responses of V4 neurons. *Vision Res* 49:1182–1187.
- 795 Hillyard SA, Munte TF (1984) Selective attention to color and location - an analysis  
796 with event-related brain potentials. *Percept Psychophys* 36:185–198.
- 797 Hopf J-M, Boelmans K, Schoenfeld MA, Luck SJ, Heinze H-J (2004) Attention to  
798 features precedes attention to locations in visual search: evidence from electromagnetic  
799 brain responses in humans. *J Neurosci* 24:1822–1832.
- 800 Hummer A, Ritter M, Tik M, Ledolter AA, Woletz M, Holder GE, Dumoulin SO,  
801 Schmidt-Erfurth U, Windischberger C (2016) Eyetracker-based gaze correction for ro-  
802 bust mapping of population receptive fields. *NeuroImage* 142:211–224.
- 803 Ibos G, Freedman DJ (2016) Interaction between spatial and feature attention in pos-  
804 terior parietal cortex. *Neuron* 91:931–943.
- 805 Jehee JFM, Brady DK, Tong F (2011) Attention improves encoding of task-relevant  
806 features in the human visual cortex. *J Neurosci* 31:8210–8219.
- 807 Jenkinson M, Beckmann CF, Behrens TEJ, Woolrich MW, Smith SM (2012) FSL. *Neu-  
808 roImage* 62:782–790.
- 809 Jerde TA, Merriam EP, Riggall AC, Hedges JH, Curtis CE (2012) Prioritized maps of  
810 space in human frontoparietal cortex. *J Neurosci* 32:17382–17390.
- 811 Kastner S, Pinsk MA (2004) Visual attention as a multilevel selection process. *Cogn  
812 Affect Behav Neurosci* 4:483–500.
- 813 Katzner S, Busse L, Treue S (2009) Attention to the color of a moving stimulus mod-  
814 ulates motion-signal processing in macaque area MT: Evidence for a unified attentional  
815 system. *Front Sys Neurosci* 3:12.
- 816 Kay KN, Weiner KS, Grill-Spector K (2015) Attention reduces spatial uncertainty in  
817 human ventral temporal cortex. *Curr Biol* 25:595–600.
- 818 Kay KN, Yeatman JD (2017) Bottom-up and top-down computations in word- and

- 819 face-selective cortex. *eLife* 6:284.
- 820 Kingstone A (1992) Combining expectancies. *Q J Exp Psychol A* 44:69–104.
- 821 Klein BP, Harvey BM, Dumoulin SO (2014) Attraction of position preference by spatial  
822 attention throughout human visual cortex. *Neuron* 84:227–237.
- 823 Knapen T, de Gee JW, Brascamp J, Nuiten S, Hoppenbrouwers S, Theeuwes J (2016)  
824 Cognitive and ocular factors jointly determine pupil responses under equiluminance.  
825 *PLoS ONE* 11:e0155574.
- 826 Korn CW, Bach DR (2016) A solid frame for the window on cognition: Modeling  
827 event-related pupil responses. *J Vis* 16:28.
- 828 Kravitz DJ, Behrmann M (2011) Space-, object-, and feature-based attention interact  
829 to organize visual scenes. *Atten Percept Psychophys* 73:2434–2447.
- 830 Kumada T (2001) Feature-based control of attention: Evidence for two forms of di-  
831 mension weighting. *Percept Psychophys* 63:698–708.
- 832 Lee S, Papanikolaou A, Logothetis NK, Smirnakis SM, Keliris GA (2013) A new  
833 method for estimating population receptive field topography in visual cortex. *NeuroIm-  
834 age* 81:144–157.
- 835 Leonard CJ, Balestreri A, Luck SJ (2015) Interactions between space-based and  
836 feature-based attention. *J Exp Psychol Human* 41:11–16.
- 837 Levin N, Dumoulin SO, Winawer J, Dougherty RF, Wandell BA (2010) Cortical maps  
838 and white matter tracts following long period of visual deprivation and retinal image  
839 restoration. *Neuron* 65:21–31.
- 840 Liu J, Wandell BA (2005) Specializations for chromatic and temporal signals in human  
841 visual cortex. *J Neurosci* 25:3459–3468.
- 842 Love J, Selker R, Marsman M, Jamil T, Dropmann D (2015) Jasp (version 0.7)[com-  
843 puter software]. Amsterdam, The Netherlands: JASP Project.
- 844 Luck SJ, Chelazzi L, Hillyard SA, Desimone R (1997) Neural mechanisms of spatial  
845 selective attention in areas V1, V2, and V4 of macaque visual cortex. *J Neurophysiol*  
846 77:24–42.
- 847 Mackey WE, Winawer J, Curtis CE (2017) Visual field map clusters in human fron-  
848 toparietal cortex. *eLife* 6:e22974.
- 849 Maunsell JHR, Treue S (2006) Feature-based attention in visual cortex. *Trends Neu-*

850 rosci 29:317–322.

851 McAdams CJ, Maunsell J (2000) Attention to both space and feature modulates neu-  
852 ronal responses in macaque area V4. *J Neurophysiol* 83:1751–1755.

853 Miconi T, VanRullen R (2016) A feedback model of attention explains the diverse  
854 effects of attention on neural firing rates and receptive field structure. *PLoS Comput Biol*  
855 12:e1004770.

856 Moore T, Armstrong KM (2003) Selective gating of visual signals by microstimulation  
857 of frontal cortex. *Nature* 421:370–373.

858 Motter BC (1994) Neural correlates of attentive selection for color or luminance in  
859 extrastriate area V4. *J Neurosci* 14:2178–2189.

860 Müller MM, Andersen S, Trujillo NJ, Valdés-Sosa P, Malinowski P, Hillyard SA (2006)  
861 Feature-selective attention enhances color signals in early visual areas of the human brain.  
862 *Proc Natl Acad Sci USA* 103:14250–14254.

863 Nordfang M, Staugaard C, Bundesen C (2017) Attentional weights in vision as prod-  
864 ucts of spatial and nonspatial components. *Psychon Bull Rev* 23:238–239.

865 O’Craven KM, Downing PE, Kanwisher N (1999) fMRI evidence for objects as the  
866 units of attentional selection. *Nature* 401:584–587.

867 Patzwahl DR, Treue S (2009) Combining spatial and feature-based attention within  
868 the receptive field of MT neurons. *Vision Res* 49:1188–1193.

869 Pedregosa F, Eickenberg M, Ciuciu P, Thirion B, Gramfort A (2015) Data-driven HRF  
870 estimation for encoding and decoding models. *NeuroImage* 104:209–220.

871 Peirce JW (2008) Generating stimuli for neuroscience using PsychoPy. *Front Neu-*  
872 *roinform* 2:10.

873 Pestilli F, Carrasco M (2005) Attention enhances contrast sensitivity at cued and im-  
874 pairs it at uncued locations. *Vision Res* 45:1867–1875.

875 Poldrack RA (2017) Precision neuroscience: Dense sampling of individual brains.  
876 *Neuron* 95:727–729.

877 Posner MI, Snyder CR, Davidson BJ (1980) Attention and the detection of signals. *J*  
878 *Exp Psychol* 109:160–174.

879 Powell MJD (1964) An efficient method for finding the minimum of a function of

- 880 several variables without calculating derivatives. *Comput J* 7:155–162.
- 881 Puckett AM, DeYoe EA (2015) The attentional field revealed by single-voxel modeling  
882 of fMRI time courses. *J Neurosci* 35:5030–5042.
- 883 Reynolds JH, Heeger DJ (2009) The normalization model of attention. *Neuron*  
884 61:168–185.
- 885 Reynolds JH, Pasternak T, Desimone R (2000) Attention increases sensitivity of V4  
886 neurons. *Neuron* 26:703–714.
- 887 Rizzolatti G, Riggio L, Dascola I, Umiltá C (1987) Reorienting attention across the  
888 horizontal and vertical meridians: evidence in favor of a premotor theory of attention.  
889 *Neuropsychologia* 25:31–40.
- 890 Roberts M, Delicato LS, Herrero J, Gieselmann MA, Thiele A (2007) Attention alters  
891 spatial integration in macaque V1 in an eccentricity-dependent manner. *Nat Neurosci*  
892 10:1483–1491.
- 893 Rosenholtz R (2016) Capabilities and limitations of peripheral vision. *Annu Rev Vis*  
894 *Sci* 2:437–457.
- 895 Rossi AF, Paradiso MA (1995) Feature-specific effects of selective visual-attention.  
896 *Vision Res* 35:621–634.
- 897 Saenz M, Buračas GT, Boynton GM (2002) Global effects of feature-based attention  
898 in human visual cortex. *Nat Neurosci* 5:631–632.
- 899 Saenz M, Buračas GT, Boynton GM (2003) Global feature-based attention for motion  
900 and color. *Vision Res* 43:629–637.
- 901 Savitzky A, Golay MJE (1964) Smoothing and differentiation of data by simplified  
902 least squares procedures. *Anal Chem* 36:1627–1639.
- 903 Schneider KA, Richter MC, Kastner S (2004) Retinotopic organization and functional  
904 subdivisions of the human lateral geniculate nucleus: a high-resolution functional mag-  
905 netic resonance imaging study. *J Neurosci* 24:8975–8985.
- 906 Schoenfeld MA, Hopf J-M, Martinez A, Mai HM, Sattler C, Gasde A, Heinze H-J,  
907 Hillyard SA (2007) Spatio-temporal analysis of feature-based attention. *Cereb Cortex*  
908 17:2468–2477.
- 909 Schoenfeld MA, Hopf J-M, Merkel C, Heinze H-J, Hillyard SA (2014) Object-based  
910 attention involves the sequential activation of feature-specific cortical modules. *Nat Neu-*

911 rosci 17:619–624.

912 Serences JT, Boynton GM (2007) Feature-based attentional modulations in the ab-  
913 sence of direct visual stimulation. *Neuron* 55:301–312.

914 Sheremata SL, Silver MA (2015) Hemisphere-dependent attentional modulation of  
915 human parietal visual field representations. *J Neurosci* 35:508–517.

916 Shulman GL (2002) Two attentional processes in the parietal lobe. *Cereb Cortex*  
917 12:1124–1131.

918 Silva MF, Brascamp JW, Ferreira S, Castelo-Branco M, Dumoulin SO, Harvey BM  
919 (2017) Radial asymmetries in population receptive field size and cortical magnification  
920 factor in early visual cortex. *NeuroImage* 167:41–52.

921 Silver MA, Ress D, Heeger DJ (2005) Topographic maps of visual spatial attention in  
922 human parietal cortex. *J Neurophysiol* 94:1358–1371.

923 Snyder LH, Grieve KL, Brotchie P, Andersen RA (1998) Separate body- and world-  
924 referenced representations of visual space in parietal cortex. *Nature* 394:887–891.

925 Sprague TC, Serences JT (2013) Attention modulates spatial priority maps in the hu-  
926 man occipital, parietal and frontal cortices. *Nat Neurosci* 16:1879–1887.

927 Swisher JD, Halko MA, Merabet LB, McMains SA, Somers DC (2007) Visual topog-  
928 raphy of human intraparietal sulcus. *J Neurosci* 27:5326–5337.

929 Szczepanski SM, Pinsk MA, Douglas MM, Kastner S, Saalmann YB (2013) Functional  
930 and structural architecture of the human dorsal frontoparietal attention network. *Proc*  
931 *Natl Acad Sci USA* 110:15806–15811.

932 Theeuwes J, van der Burg E (2007) The role of spatial and nonspatial information in  
933 visual selection. *J Exp Psychol Human* 33:1335–1351.

934 Tootell RB, Hadjikhani N, Hall EK, Marrett S, Vanduffel W, Vaughan JT, Dale AM  
935 (1998) The retinotopy of visual spatial attention. *Neuron* 21:1409–1422.

936 Treue S, Maunsell JH (1996) Attentional modulation of visual motion processing in  
937 cortical areas MT and MST. *Nature* 382:539–541.

938 Treue S, Trujillo JCM (1999) Feature-based attention influences motion processing  
939 gain in macaque visual cortex. *Nature* 399:575–579.

940 Trotter Y, Celebrini S (1999) Gaze direction controls response gain in primary visual-



- 941 cortex neurons. *Nature* 398:239–242.
- 942 van Opstal AJ, Hepp K, Suzuki Y, Henn V (1995) Influence of eye position on activity  
943 in monkey superior colliculus. *J Neurophysiol* 74:1593–1610.
- 944 Vo VA, Sprague TC, Serences JT (2017) Spatial tuning shifts increase the discrim-  
945 inability and fidelity of population codes in visual cortex. *J Neurosci* 37:3386–3401.
- 946 Watson AB, Pelli DG (1983) Quest: A Bayesian adaptive psychometric method. *Per-  
947 cept Psychophys* 33:113–120.
- 948 Wegener D, Ehn F, Aurich MK, Galashan FO, Kreiter AK (2008) Feature-based atten-  
949 tion and the suppression of non-relevant object features. *Vision Res* 48:2696–2707.
- 950 White AL, Carrasco M (2011) Feature-based attention involuntarily and simultane-  
951 ously improves visual performance across locations. *J Vis* 11:15–15.
- 952 White AL, Rolfs M, Carrasco M (2015) Stimulus competition mediates the joint ef-  
953 fects of spatial and feature-based attention. *J Vis* 15:7–7.
- 954 Wolfe JM, Butcher SJ, Lee C, Hyle M (2003) Changing your mind: On the contribu-  
955 tions of top-down and bottom-up guidance in visual search for feature singletons. *J Exp  
956 Psychol Human* 29:483–502.
- 957 Wolfe JM, Horowitz TS (2004) What attributes guide the deployment of visual atten-  
958 tion and how do they do it? *Nat Rev Neurosci* 5:nrn1411–501.
- 959 Womelsdorf T, Anton-Erxleben K, Pieper F, Treue S (2006) Dynamic shifts of visual  
960 receptive fields in cortical area MT by spatial attention. *Nat Neurosci* 9:1156–1160.
- 961 Womelsdorf T, Anton-Erxleben K, Treue S (2008) Receptive field shift and shrink-  
962 age in macaque middle temporal area through attentional gain modulation. *J Neurosci*  
963 28:8934–8944.
- 964 Yeshurun Y, Carrasco M (1998) Attention improves or impairs visual performance by  
965 enhancing spatial resolution. *Nature* 396:72–75.
- 966 Yeshurun Y, Carrasco M (1999) Spatial attention improves performance in spatial  
967 resolution tasks. *Vision Res* 39:293–306.
- 968 Yeshurun Y, Carrasco M (2000) The locus of attentional effects in texture segmenta-  
969 tion. *Nat Neurosci* 3:622–627.
- 970 Yeshurun Y, Montagna B, Carrasco M (2008) On the flexibility of sustained attention

971 and its effects on a texture segmentation task. *Vision Res* 48:80–95.

972 Zanto TP, Rubens MT, Bollinger J, Gazzaley A (2010) Top-down modulation of visual  
973 feature processing: the role of the inferior frontal junction. *NeuroImage* 53:736–745.

974 Zhang W, Luck SJ (2009) Feature-based attention modulates feedforward visual pro-  
975 cessing. *Nat Neurosci* 12:24–25.

976 Zhou H, Desimone R (2011) Feature-based attention in the frontal eye field and area  
977 V4 during visual search. *Neuron* 70:1205–1217.

978 Zuiderbaan W, Harvey BM, Dumoulin SO (2012) Modeling center-surround config-  
979 urations in population receptive fields using fMRI. *J Vis* 12:10.

## Supplementary Material

### Introduction

This document contains figures and analyses performed for individual subjects. Results are reported using different methods. The ‘super subject’ method pools voxels across subjects and computes p-values and confidence intervals using bootstrapping across voxels. Resulting p-values were FDR corrected for multiple comparisons. This corresponds to what is reported in the main text. The ‘per subject’ method computes these same analyses, but for each subject individually. We report in how many of the subjects these bootstrap tests over voxels are significant with uncorrected  $p < .05$ . The ‘over subjects’ method takes the average over the ‘per subject’ results, and computes confidence intervals and t-tests over these 5 values. Statistical tables for all analyses are found at the bottom of this document.

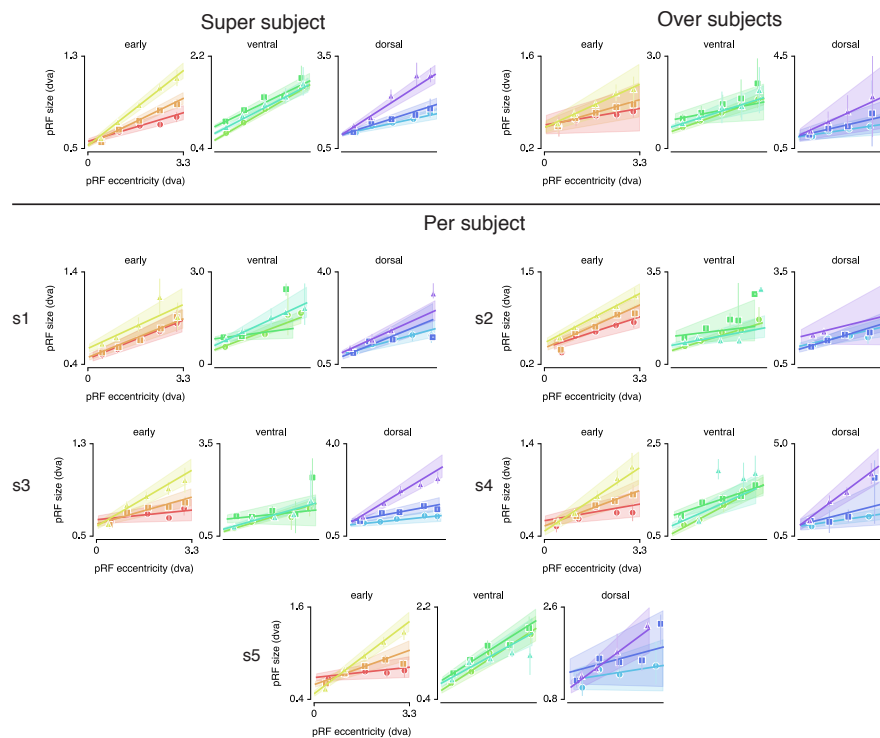

Figure 1: Eccentricity-size relations for all statistical methods.

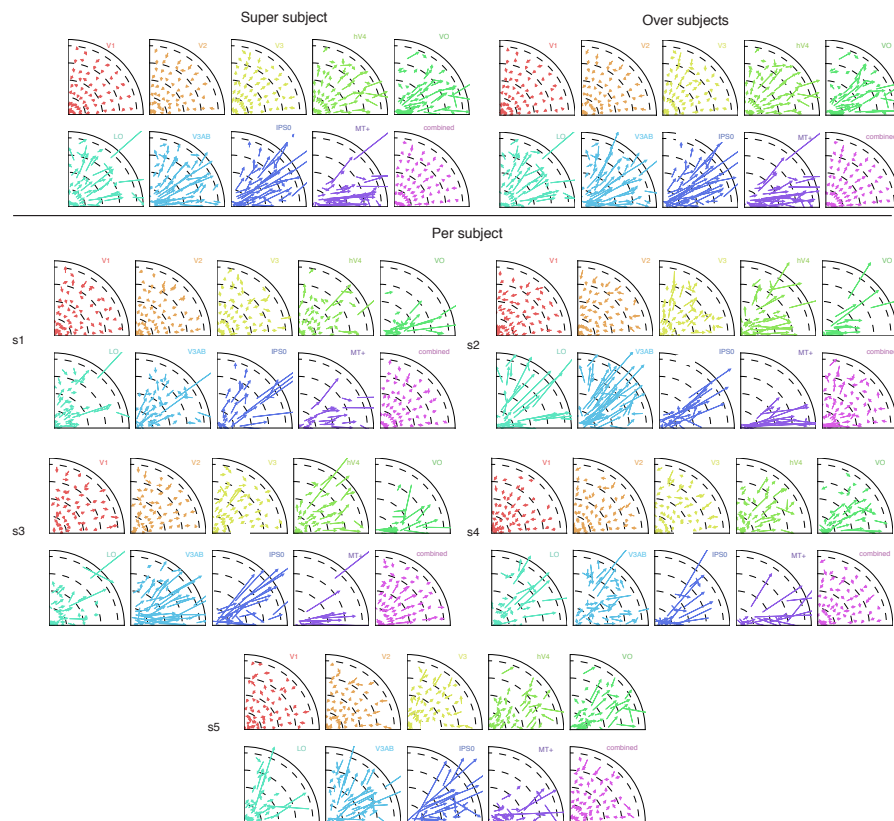

Figure 2: pRF shift plots for the different statistical methods. Shift vectors run from the *Attend Fixation* to the *Attend Stimulus* pRF location. This figure indicates that the shift patterns seen in the super subject are almost identical to the over subjects method, and highly agree with the individual subject figures. Note the radial shift direction that is readily apparent in all ROIs in all subjects. Also note how the *combined* ROI clearly shows paravoveal pRFs shifting toward the periphery and peripheral pRFs shifting toward the fovea across subjects. Finally, the absence of pRFs near the vertical meridian in data from all subjects in VO, IPS0 and MT+ highlight the overrepresentation of the horizontal meridian that is found in all ROIs (see Tables 2, 12 and 13).

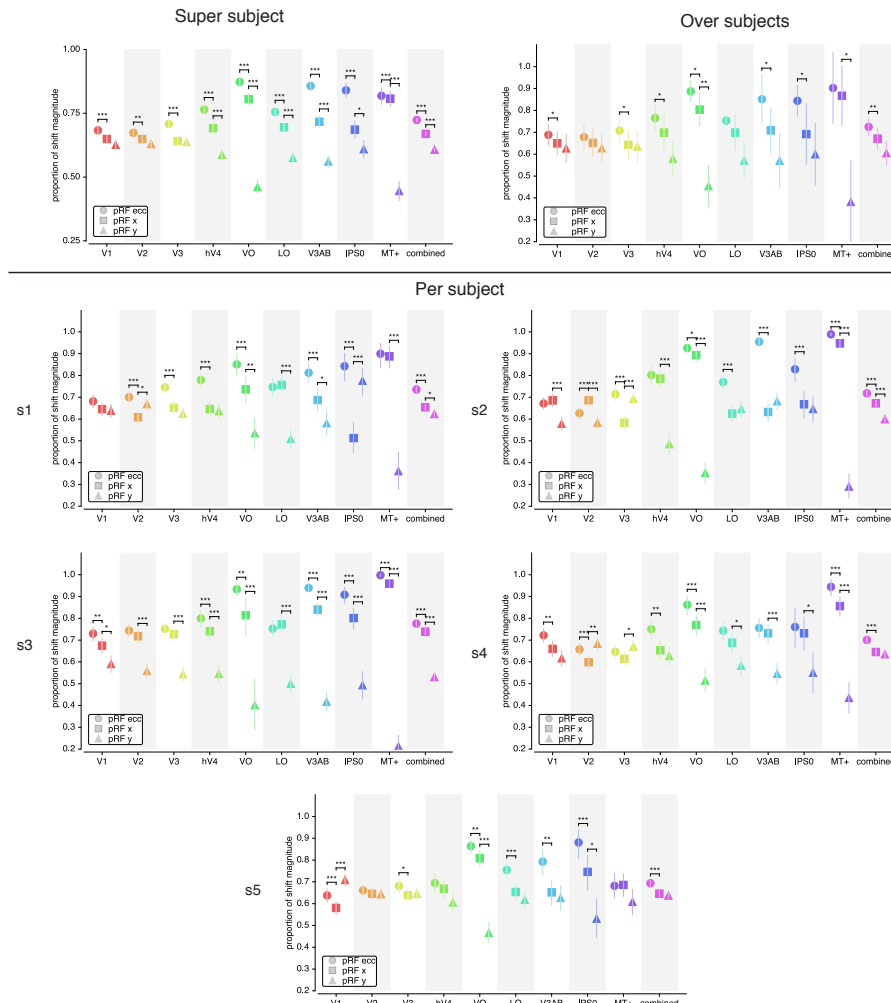

Figure 3: pRF shift directions for the different statistical methods. The ‘over subject’ panel replicates the ‘super subject’ results, namely that shifts are best explained by eccentricity changes, followed by changes in pRF x and finally in pRF y in all ROIs. The dominance of eccentricity over x changes was significant in all individual subjects (‘per subject’ method) in the *combined* ROI, and in at least 2 (but often 5) subjects in all other ROIs (see Table 10). The individual subject evidence also replicated the finding that pRFs shifted more in the x compared to y directions in hv4/VO/LO/V3AB/IPS0/MT+ and in the combined ROI (see Table 11). The dominance of x over y shifts was explained from a non-uniformity in the distribution of pRF polar angle (i.e. overrepresentation of horizontal meridian, see Table 2). This was also found in most individual subjects for most ROIs (see Tables 12 and 13). Single, double and tripple asterisks indicate significant differences at  $p < .05$ ,  $.01$  and  $.001$  respectively.

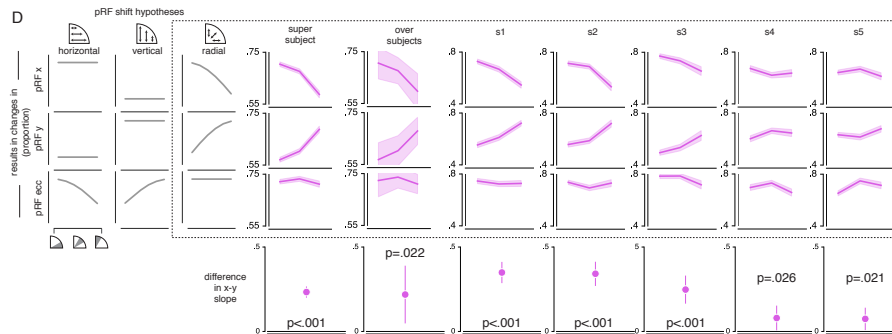

Figure 4: pRF x, y and eccentricity position shifts plotted as a function of polar angle, for different shift direction hypotheses. The data from all statistical methods closely matches the radial shift direction hypothesis, showing strongest pRF x shifts close to the horizontal meridian, strongest pRF y shifts close to the vertical meridian and no polar angle dependence of pRF eccentricity shifts. This is evidenced by a more positive slope of y change over polar angle compared to slope of x change over polar angle in the 'super subject' method (see main text for statistics), for the 'over subjects' method (slope difference = 0.219,  $t(4) = 3.616$ ,  $p = 0.022$ , Cohen's  $d = 1.808$ ), and was significant in every individual subject. Error bars reflect 95% CIs across voxels in the 'super subject' and 'per subject' method, and across subjects in the 'over subjects' method.

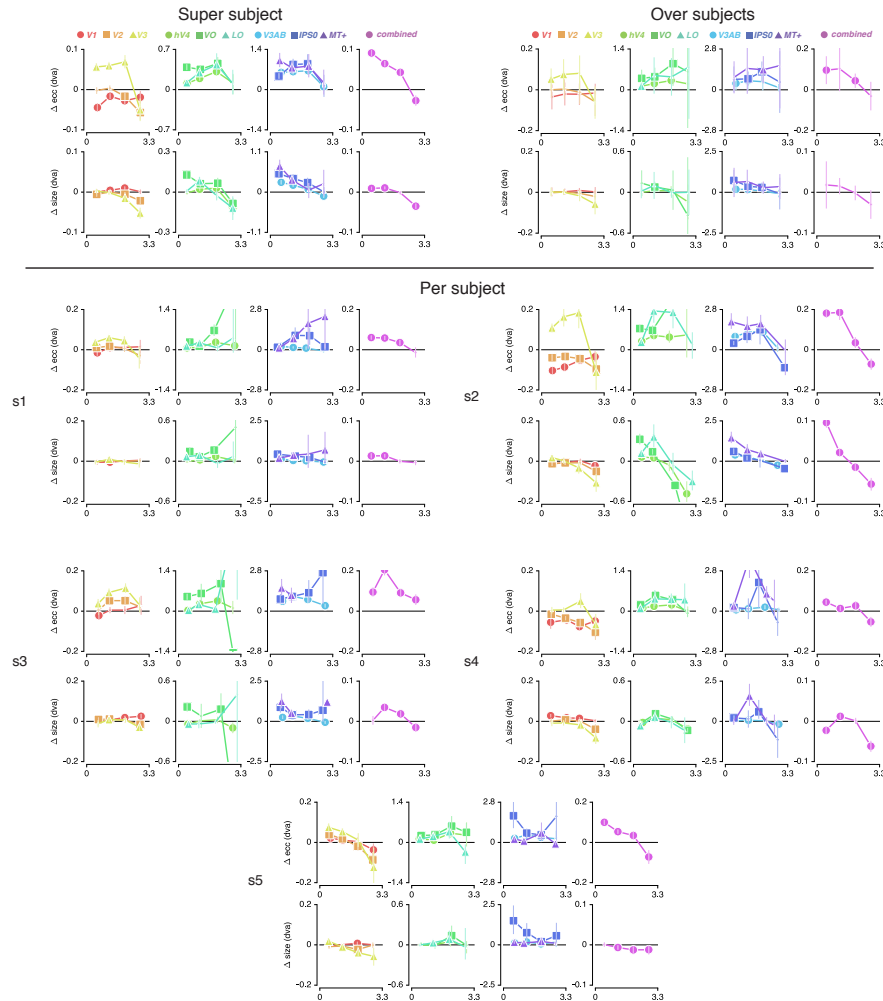

Figure 5: Difference between *Attention to Stimulus* and *Attention to Fixation* pRF eccentricity and size as a function of *Attention to Fixation* eccentricity (see Tables 3-6 and 14-21). The data shows a transition from inwards to outwards shifts across the visual hierarchy in all subjects. Additionally, the progressions of change over eccentricity are similar within ROIs across subjects. Finally, data from the *combined* ROI in most subjects reveals that parafoveal pRFs tend to shift away from the fovea and increase in size, while peripheral pRFs tend to shift toward the fovea and decrease in sizes. In the 'super subject' and 'per subject' methods markers' errorbar denotes 95% CI of data over voxels; in the 'over subjects' method, errorbar denotes 95% CI over subjects. Increased marker size indicates significance with  $p < .05$  (FDR corrected for 'super subject').

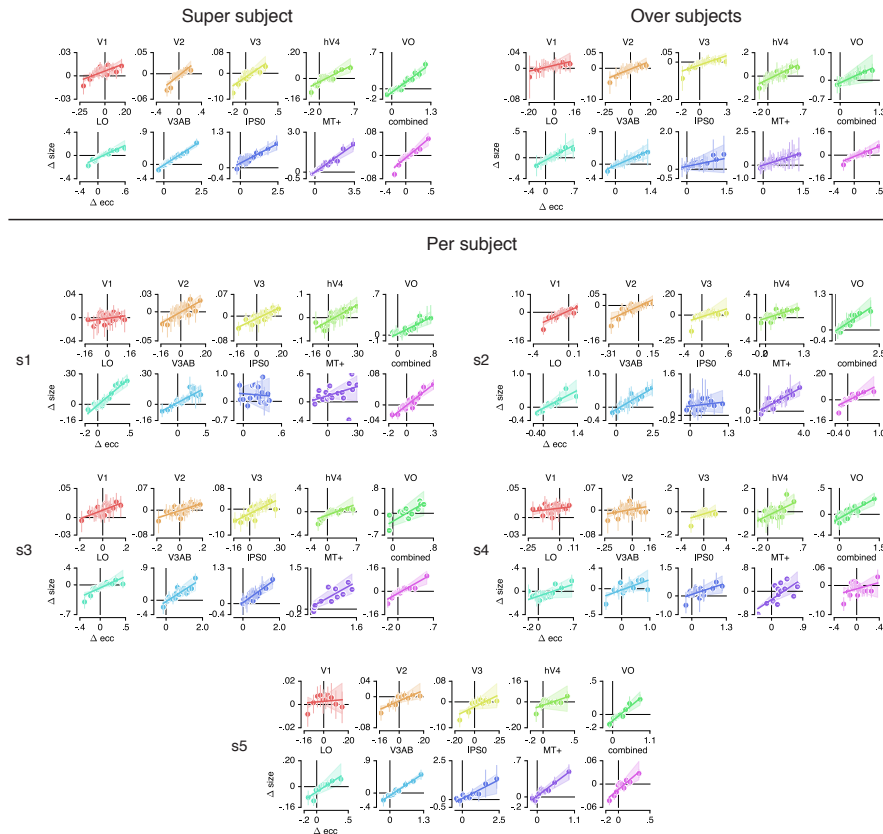

Figure 6: Changes in pRF eccentricity and size were strongly correlated in all ROIs. In the 'over subjects' method, we find that pRF eccentricity and size changes are significant in all ROIs except IPSO (although  $p = .070$ ). In the 'per subject method', we find such a significant correlation in at least 2 (but often 5) subjects (see Table 22). In the 'super subject' and for 'per subjects' figures, markers' errorbar denotes 95% CI of data over voxels; in the 'over subjects' figure, errorbar denotes 95% CI over subjects.



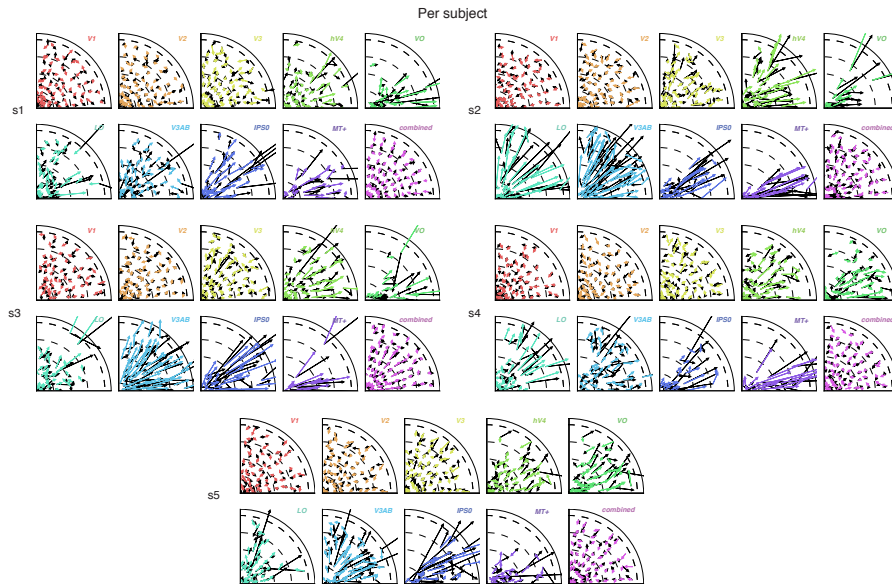

Figure 7: Attentional gain field modeling results for each subject. Arrows depict observed (black) and predicted (color) pRF shifts. This shows that the model closely captured the data in all individual subjects.

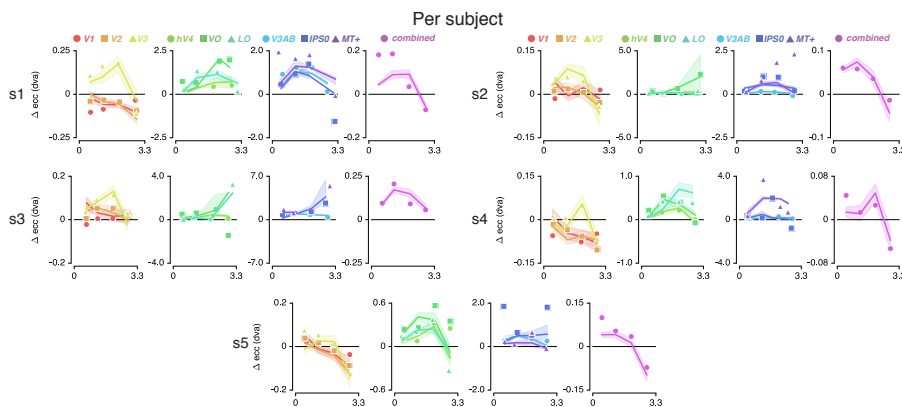

Figure 8: Attentional gain field modeling results for each subject. Observed (markers) and predicted (solid lines) pRF eccentricity difference between *Attend Fixation* and *Attend Stimulus* conditions for each subject. Shaded areas indicate 95% CI over voxels. This shows that the model was able to capture between subject variance with a high accuracy.

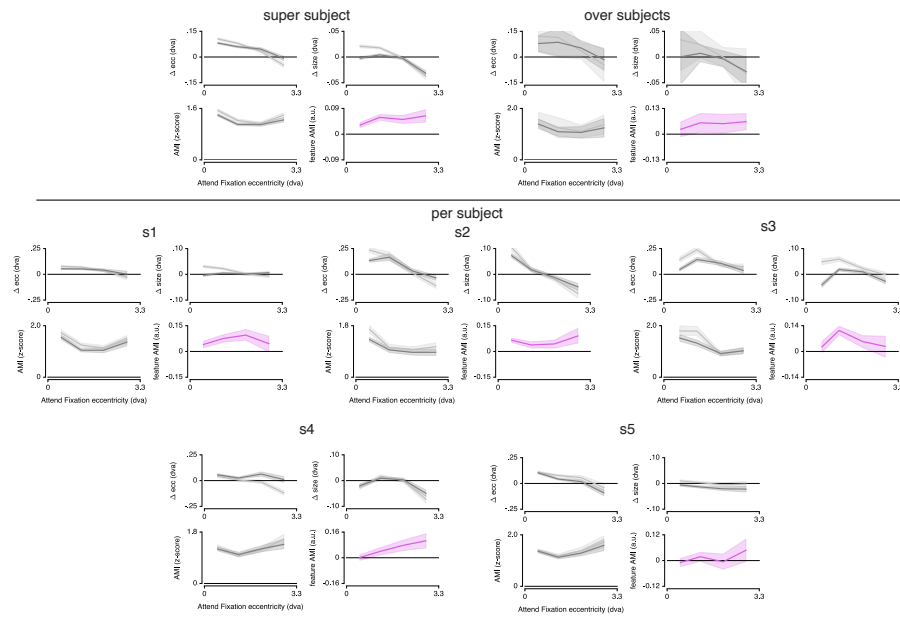

Figure 9: Differences in pRF eccentricity and size relative to the *Attention to Fixation* condition, for both the *Attention to Color* and *Attention to TF* condition separately. The changes in both eccentricity and size are more pronounced when attending changes in color versus TF in the bar. This pattern is most clear in the 'super subject' and 'over subjects' method (albeit with larger variance), and is present in most individual subjects. In the 'super subject' and 'per subject' figures, error bars denote 95% CI over voxels, in the 'over subject' method error bars indicate 95% CI over subjects.

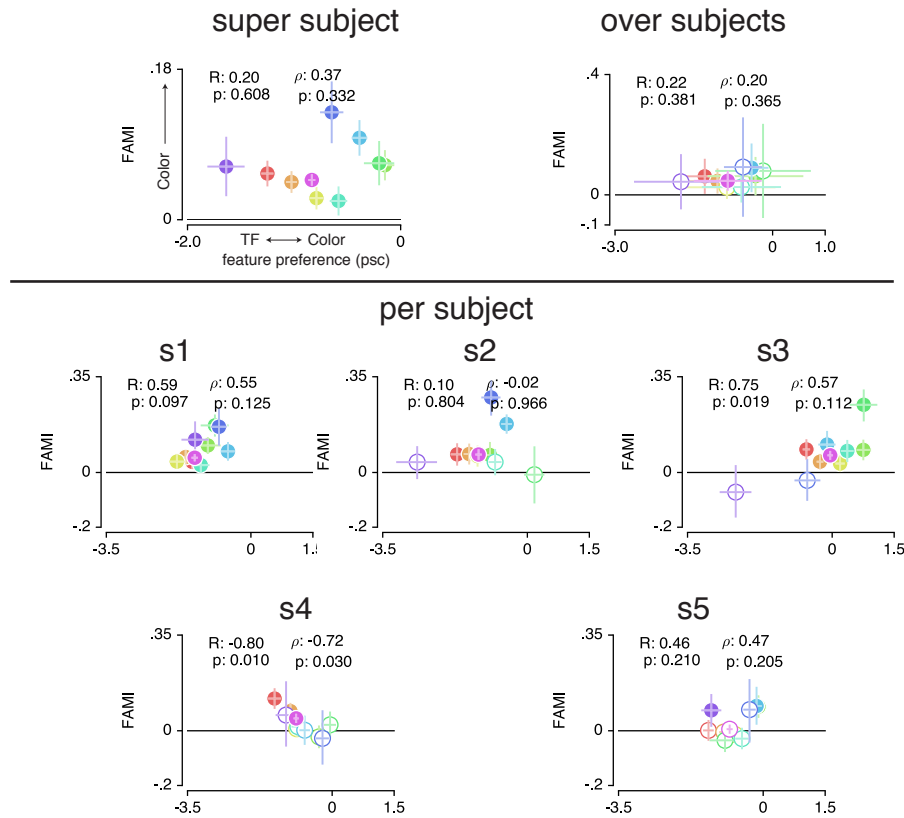

Figure 10: Feature AMI compared to feature preference for each ROI, for each statistical method. The y-axis displays feature AMI, which increases when pRF modulations (size and eccentricity changes combined, see Methods) are greater when attending color compared to TF. The x-axis displays feature preference, which increases with higher color compared to TF preference. pRF modulations were greater when attending color in all ROIs in the ‘super subject’ method, and was unrelated to feature preference (see Table 8). In the ‘over subjects’ method, we confirm that feature AMI was not different between ROIs over subjects (RM ANOVA, factor of ROI:  $F(8,4) = 1.108$ ,  $p = 0.384$ ,  $\eta^2 p = 0.225$ ), and that it was on average 0.064 over ROIs across subjects,  $t(4) = 4.654$ ,  $p = 0.010$ , cohen’s  $d = 2.081$ ). Additionally, we found that feature AMI was significantly positive in at least 2 (but often 4) out of 5 subjects in each ROI (see Table 23). Finally, we also found no correlation with feature preference in the ‘over subjects’ method ( $t(4) = 0.655$ ,  $p = .549$ , cohen’s  $d = 0.33$ ).

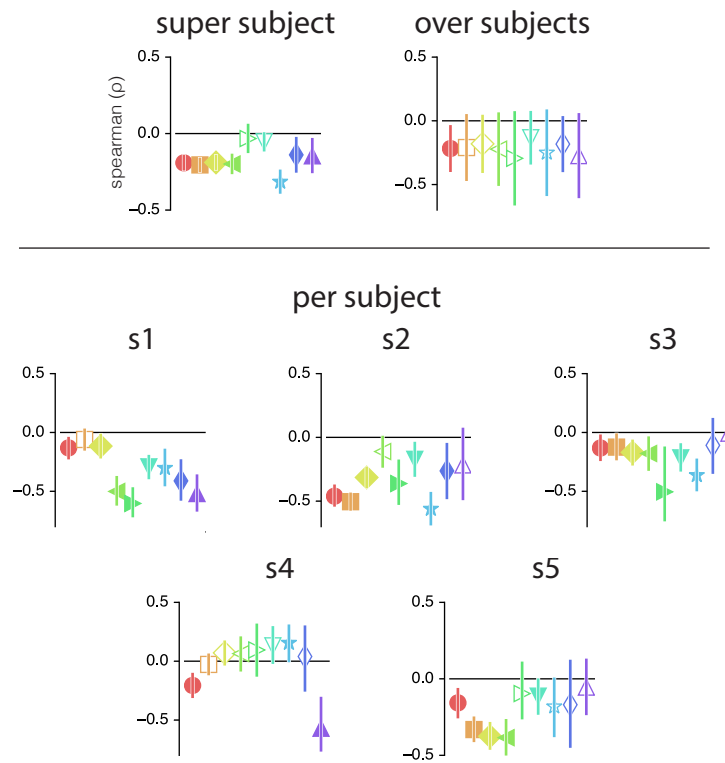

Figure 11: Color compared to TF preference versus eccentricity correlations. The 'super subject' method shows negative correlations in all ROIs except VO and LO. The 'over' subjects method shows that this correlation is negative on average and does not vary across ROI (RM ANOVA with main factor of ROI  $F(8,4) = 0.354$ ,  $p = .937$ ,  $\eta^2 p = .030$ , on average  $-0.218$  over ROIs,  $F(1,4) = 15.630$ ,  $p = .017$ ,  $\eta^2 p = .641$ ). When looking at individual subjects, we find that correlations are positive in at least two but often in the majority of subjects across ROIs (see Table 24).

## Statistical Tables - Main Text

Table 1: Statistics corresponding to Figure 2C on pRF shift direction ratios. P-values reflect proportion of bootstrapped differences that are different from 0. Single, double and triple asterisks indicate FDR corrected significance of <.05, <.01 and <.001 respectively. FDR correction performed over all p-values in this table simultaneously.

| ROI      | x>y   |          |                |           | ecc>x |          |                |           |
|----------|-------|----------|----------------|-----------|-------|----------|----------------|-----------|
|          | N     | p        | $\Delta$ ratio | cohen's d | N     | p        | $\Delta$ ratio | cohen's d |
| V1       | 2176  | .098     | .02            | .04       | 2176  | <.001*** | .03            | .09       |
| V2       | 2752  | .102     | .02            | .03       | 2752  | .002**   | .02            | .06       |
| V3       | 2320  | .773     | .00            | .01       | 2318  | <.001*** | .07            | .18       |
| hV4      | 1201  | <.001*** | .10            | .18       | 1201  | <.001*** | .07            | .20       |
| VO       | 582   | <.001*** | .34            | .67       | 573   | <.001*** | .08            | .37       |
| LO       | 1397  | <.001*** | .12            | .20       | 1394  | <.001*** | .06            | .16       |
| V3AB     | 880   | <.001*** | .16            | .27       | 873   | <.001*** | .15            | .46       |
| IPS0     | 313   | .023*    | .08            | .14       | 313   | <.001*** | .16            | .61       |
| MT+      | 325   | <.001*** | .36            | .68       | 306   | <.001*** | .04            | .28       |
| combined | 11946 | <.001*** | .06            | .10       | 11940 | <.001*** | .05            | .15       |

Table 2: Statistics corresponding to Figure 2 on uniformity of polar angle distributions. P-values test whether pRFs are distributed non-uniformly over polar angle (Rayleigh test). Triple asterisks indicate FDR corrected significance of <.001. FDR correction performed over all p-values in this table simultaneously.

| ROI  | N    | z       | p        |
|------|------|---------|----------|
| V1   | 2176 | 66.848  | <.001*** |
| V2   | 2754 | 51.904  | <.001*** |
| V3   | 2322 | 63.704  | <.001*** |
| hV4  | 1201 | 50.418  | <.001*** |
| VO   | 582  | 116.563 | <.001*** |
| LO   | 1405 | 40.995  | <.001*** |
| V3AB | 883  | 32.554  | <.001*** |

| ROI      | N     | z       | p        |
|----------|-------|---------|----------|
| IPSO     | 316   | 56.946  | <.001*** |
| MT+      | 328   | 119.052 | <.001*** |
| combined | 11967 | 463.382 | <.001*** |

Table 3: Statistics corresponding to Figure 3A on pRF eccentricity changes. P-values reflect whether bootstrapped distribution is different from 0, for each ROI and each eccentricity bin (bin 3 and 4 in table below). Single, double and triple asterisks indicate FDR corrected significance of <.05, <.01 and <.001 respectively. FDR correction performed over all p-values in this table simultaneously.

| ecc bin  | 1    |          |       |              | 2         |          |       |      |              |
|----------|------|----------|-------|--------------|-----------|----------|-------|------|--------------|
|          | ROI  | N        | p     | $\Delta$ ecc | cohen's d | ROI      | N     | p    | $\Delta$ ecc |
| V1       | 509  | <.001*** | -.044 | -.44         | 749       | <.001*** | -.016 | -.20 |              |
| V2       | 862  | 0.504    | -.002 | -.02         | 931       | .204     | .004  | .04  |              |
| V3       | 920  | <.001*** | .056  | .49          | 747       | <.001*** | .059  | .58  |              |
| hV4      | 693  | <.001*** | .109  | .67          | 359       | <.001*** | .194  | .64  |              |
| VO       | 313  | <.001*** | .389  | 1.04         | 162       | <.001*** | .352  | .85  |              |
| LO       | 1047 | <.001*** | .121  | .62          | 263       | <.001*** | .295  | .60  |              |
| V3AB     | 220  | <.001*** | .600  | .86          | 348       | <.001*** | .623  | .87  |              |
| IPSO     | 170  | <.001*** | .473  | .91          | 86        | <.001*** | .876  | 1.05 |              |
| MT+      | 186  | <.001*** | 1.015 | .68          | 103       | <.001*** | .759  | .66  |              |
| combined | 4920 | <.001*** | .091  | .45          | 3748      | <.001*** | .065  | .37  |              |

Table 4: Statistics corresponding to Figure 3A on pRF eccentricity changes. P-values reflect whether bootstrapped distribution is different from 0, for each ROI and each eccentricity bin (bin 1 and 2 in table above). Single, double and triple asterisks indicate FDR corrected significance of <.05, <.01 and <.001 respectively. FDR correction performed over all p-values in this table simultaneously.

| ecc bin | 3   |   |   |              | 4         |     |   |   |              |
|---------|-----|---|---|--------------|-----------|-----|---|---|--------------|
|         | ROI | N | p | $\Delta$ ecc | cohen's d | ROI | N | p | $\Delta$ ecc |

| ecc bin  | 3    |          |       |      | 4    |          |       |      |
|----------|------|----------|-------|------|------|----------|-------|------|
| V1       | 595  | <.001*** | -.028 | -.30 | 323  | .010*    | -.019 | -.15 |
| V2       | 616  | <.001*** | -.017 | -.16 | 343  | <.001*** | -.057 | -.36 |
| V3       | 427  | <.001*** | .069  | .43  | 226  | <.001*** | -.050 | -.24 |
| hV4      | 110  | <.001*** | .313  | .91  | 39   | 0.046    | .115  | .27  |
| VO       | 71   | <.001*** | .455  | 1.05 | 36   | .325     | .081  | .14  |
| LO       | 56   | <.001*** | .434  | .64  | 31   | .260     | .108  | .17  |
| V3AB     | 199  | <.001*** | .657  | .93  | 113  | .017*    | .102  | .21  |
| IPSO     | 36   | <.001*** | .896  | 1.01 | 21   | .470     | .135  | .17  |
| MT+      | 18   | <.001*** | .818  | 1.04 | 18   | .249     | .240  | .27  |
| combined | 2128 | <.001*** | .043  | .22  | 1150 | <.001*** | -.027 | -.14 |

Table 5: Statistics corresponding to Figure 3B on pRF size changes. P-values reflect whether bootstrapped pRF size difference distribution is different from 0, for each ROI and eccentricity bins 1 and 2 (bin 3 and 4 in table below). Single, double and triple asterisks indicate FDR corrected significance of <.05, <.01 and <.001 respectively. FDR correction performed over all p-values in this table simultaneously.

| ecc bin  | 1    |          |               |           | 2    |          |               |           |
|----------|------|----------|---------------|-----------|------|----------|---------------|-----------|
| ROI      | N    | p        | $\Delta$ size | cohen's d | N    | p        | $\Delta$ size | cohen's d |
| V1       | 509  | .624     | .001          | .02       | 749  | <.001*** | .004          | .15       |
| V2       | 862  | .007*    | -.006         | -.09      | 931  | .870     | .000          | .01       |
| V3       | 920  | .237     | .003          | .04       | 747  | .613     | -.001         | -.02      |
| hV4      | 693  | .040     | -.007         | -.08      | 359  | <.001*** | .021          | .24       |
| VO       | 313  | <.001*** | .128          | .51       | 162  | <.001*** | .063          | .34       |
| LO       | 1047 | .060     | .008          | .06       | 263  | <.001*** | .084          | .36       |
| V3AB     | 220  | <.001*** | .268          | .76       | 348  | <.001*** | .189          | .65       |
| IPSO     | 170  | <.001*** | .501          | .99       | 86   | <.001*** | .369          | .79       |
| MT+      | 186  | <.001*** | .711          | .68       | 103  | <.001*** | .332          | .77       |
| combined | 4920 | <.001*** | .009          | .10       | 3748 | <.001*** | .010          | .16       |

Table 6: Statistics corresponding to Figure 3B on pRF size changes. P-values reflect whether bootstrapped pRF size difference distribution is different from 0, for each ROI and eccentricity bins 3 and 4 (bin 1 and 2 in table above). Single, double and triple asterisks indicate FDR corrected significance of <.05, <.01 and <.001 respectively. FDR correction performed over all p-values in this table simultaneously.

| ecc bin  | 3    |          |               |           | 4    |          |               |           |
|----------|------|----------|---------------|-----------|------|----------|---------------|-----------|
|          | N    | p        | $\Delta$ size | cohen's d | N    | p        | $\Delta$ size | cohen's d |
| V1       | 595  | <.001*** | .010          | .33       | 323  | .663     | .001          | .03       |
| V2       | 616  | .012*    | -.005         | -.10      | 343  | <.001*** | -.021         | -.31      |
| V3       | 427  | <.001*** | -.015         | -.19      | 226  | <.001*** | -.052         | -.54      |
| hV4      | 110  | .012*    | .029          | .24       | 39   | <.001*** | -.114         | -.72      |
| VO       | 71   | <.001*** | .066          | .41       | 36   | <.001*** | -.085         | -.98      |
| LO       | 56   | .108     | -.026         | -.21      | 31   | .006**   | -.119         | -.45      |
| V3AB     | 199  | <.001*** | .075          | .37       | 113  | <.001*** | -.111         | -.62      |
| IPS0     | 36   | <.001*** | .260          | .78       | 21   | .988     | .003          | .01       |
| MT+      | 18   | .541     | .056          | .14       | 18   | .128     | .227          | .31       |
| combined | 2128 | .252     | -.002         | -.03      | 1150 | <.001*** | -.035         | -.38      |

Table 7: Statistics corresponding to Figure 3C on correlations between eccentricity and size changes. P-values are two-tailed tests whether bootstrapped distribution of pRF eccentricity and size change correlations across bins is different from 0. Triple asterisks indicate FDR corrected significance of <.001. FDR correction performed over all p-values in this table simultaneously.

| ROI  | R    | N  | p        |
|------|------|----|----------|
| V1   | 0.74 | 20 | <.001*** |
| V2   | 0.86 | 20 | <.001*** |
| V3   | 0.87 | 20 | <.001*** |
| hV4  | 0.87 | 20 | <.001*** |
| VO   | 0.97 | 20 | <.001*** |
| LO   | 0.95 | 20 | <.001*** |
| V3AB | 0.99 | 20 | <.001*** |



| ROI      | R    | N  | p        |
|----------|------|----|----------|
| IPS0     | 0.93 | 20 | <.001*** |
| MT+      | 0.98 | 20 | <.001*** |
| combined | 0.94 | 20 | <.001*** |

Table 8: Statistics corresponding to Figure 5D on feature-based attentional modulation. P-values are uncorrected two-tailed tests whether bootstrapped feature attentional modulation index distribution is different from 0. Double and triple asterisks indicate FDR corrected significance of <.01 and <.001 respectively. FDR correction performed over all p-values in this table simultaneously.

| ROI  | N    | mean diff | p        | cohen_d |
|------|------|-----------|----------|---------|
| V1   | 1605 | 0.05      | <.001*** | 0.170   |
| V2   | 2165 | 0.04      | <.001*** | 0.146   |
| V3   | 1762 | 0.03      | <.001*** | 0.105   |
| hV4  | 860  | 0.05      | <.001*** | 0.197   |
| VO   | 451  | 0.08      | <.001*** | 0.290   |
| LO   | 1009 | 0.02      | 0.008**  | 0.085   |
| V3AB | 703  | 0.11      | <.001*** | 0.364   |
| IPS0 | 237  | 0.14      | <.001*** | 0.486   |
| MT+  | 252  | 0.08      | <.001*** | 0.270   |

Table 9: Statistics corresponding to Figure 6 on correlation between feature preference and eccentricity. P-values are uncorrected two-tailed tests whether bootstrapped correlation value of feature preference and pRF eccentricity differs from 0. Single and triple asterisks indicate FDR corrected significance of <.05 and <.001 respectively. FDR correction performed over all p-values in this table simultaneously.

| ROI | N    | corr   | p        |
|-----|------|--------|----------|
| V1  | 2154 | -0.191 | <.001*** |
| V2  | 2718 | -0.205 | <.001*** |
| V3  | 2274 | -0.189 | <.001*** |

| ROI  | N    | corr   | p        |
|------|------|--------|----------|
| hV4  | 1169 | -0.199 | <.001*** |
| VO   | 567  | -0.033 | 0.475    |
| LO   | 1365 | -0.054 | 0.052    |
| V3AB | 877  | -0.315 | <.001*** |
| IPS0 | 313  | -0.139 | 0.012*   |
| MT+  | 325  | -0.146 | 0.007*   |

2

### Statistical Tables - Supplementary Material

Table 10: Statistics corresponding to Supplementary Figure 3 on pRF x versus y shift ratios. P-values result from t-tests over the 5 subject values. Single, double and triple asterisks indicates uncorrected p-value < .05, .01 and .001 respectively. The last two columns reflect in how many out of 5 subjects these differences were different from 0 with uncorrected bootstrapped p-values of <.05 over voxels.

| ROI      | N | p      | t     | $\Delta$ ratio | cohen's d | x>y | y<x |
|----------|---|--------|-------|----------------|-----------|-----|-----|
| V1       | 5 | .614   | 0.546 | .02            | .27       | 2   | 1   |
| V2       | 5 | .638   | 0.508 | .02            | .25       | 2   | 2   |
| V3       | 5 | .882   | 0.158 | .01            | .08       | 1   | 2   |
| hV4      | 5 | .100   | 2.128 | .12            | 1.06      | 2   | 0   |
| VO       | 5 | .004** | 5.858 | .35            | 2.93      | 5   | 0   |
| LO       | 5 | .091   | 2.216 | .13            | 1.11      | 3   | 0   |
| V3AB     | 5 | .165   | 1.699 | .14            | .085      | 3   | 0   |
| IPS0     | 5 | .411   | 0.918 | .09            | .46       | 3   | 1   |
| MT+      | 5 | .014*  | 4.162 | .48            | 2.08      | 4   | 0   |
| combined | 5 | .151   | 1.773 | .07            | .89       | 3   | 0   |

Table 11: Statistics corresponding to Supplementary Figure 3 on pRF eccentricity versus x shift ratios. P-values result from t-tests over the 5 subject values. Single, double and triple asterisks indicates uncorrected p-value < .05, .01 and .001 respectively. The last two columns reflect in how many out of 5 subjects these differences were different from 0 with uncorrected bootstrapped p-values of <.05 over voxels.

| ROI      | N | p      | t     | $\Delta$ ratio | cohen's d | ecc>x | ecc<x |
|----------|---|--------|-------|----------------|-----------|-------|-------|
| V1       | 5 | .049*  | 2.797 | .04            | 1.40      | 3     | 0     |
| V2       | 5 | .350   | 1.057 | .03            | .53       | 2     | 1     |
| V3       | 5 | .036*  | 3.094 | .06            | 1.55      | 3     | 0     |
| hV4      | 5 | .037*  | 3.072 | .07            | 1.54      | 3     | 0     |
| VO       | 5 | .013*  | 4.240 | .08            | 2.12      | 5     | 0     |
| LO       | 5 | .153   | 1.764 | .06            | .88       | 2     | 0     |
| V3AB     | 5 | .037*  | 3.084 | .14            | 1.54      | 4     | 0     |
| IPS0     | 5 | .047*  | 2.845 | .15            | 1.42      | 4     | 0     |
| MT+      | 5 | .080   | 2.335 | .03            | 1.17      | 3     | 0     |
| combined | 5 | .003** | 6.707 | .05            | 3.35      | 5     | 0     |

Table 12: Rayleigh test for non-uniformity for subjects 1-3. Single, double and triple asterisks indicates uncorrected p-value < .05, .01 and .001 respectively.

| ROI  | s1  |        |          | s2  |        |          | s3  |        |          |
|------|-----|--------|----------|-----|--------|----------|-----|--------|----------|
|      | N   | z      | p        | N   | z      | p        | N   | z      | p        |
| V1   | 469 | 3.221  | .040*    | 558 | 26.131 | <.001*** | 333 | 11.823 | <.001*** |
| V2   | 592 | 0.659  | .518     | 605 | 9.986  | <.001*** | 411 | 48.090 | <.001*** |
| V3   | 533 | 1.021  | .360     | 463 | 22.909 | <.001*** | 389 | 12.275 | <.001*** |
| hV4  | 335 | 18.664 | <.001*** | 183 | 0.626  | .535     | 228 | 32.801 | <.001*** |
| VO   | 97  | 37.899 | <.001*** | 136 | 46.282 | <.001*** | 36  | 11.037 | <.001*** |
| LO   | 271 | 2.255  | .105     | 367 | 25.638 | <.001*** | 268 | 37.663 | <.001*** |
| V3AB | 169 | 4.560  | .010*    | 176 | 23.160 | <.001*** | 233 | 43.613 | <.001*** |
| IPS0 | 67  | 0.101  | .905     | 77  | 17.517 | <.001*** | 78  | 38.176 | <.001*** |
| MT+  | 43  | 14.066 | <.001*** | 71  | 17.095 | <.001*** | 43  | 27.463 | <.001*** |

|          | s1   |        |          | s2   |         |          | s3   |         |          |
|----------|------|--------|----------|------|---------|----------|------|---------|----------|
| combined | 2576 | 12.585 | <.001*** | 2636 | 119.207 | <.001*** | 2019 | 208.441 | <.001*** |

Table 13: Rayleigh test for non-uniformity for subjects 4-5. Single, double and triple asterisks indicates uncorrected p-value < .05, .01 and .001 respectively.

|          | s4   |        |          | s5   |         |          |
|----------|------|--------|----------|------|---------|----------|
| ROI      | N    | z      | p        | N    | z       | p        |
| V1       | 369  | 3.891  | .020*    | 447  | 40.575  | <.001*** |
| V2       | 563  | 4.195  | .015*    | 583  | 20.792  | <.001*** |
| V3       | 504  | 22.465 | <.001*** | 433  | 27.032  | <.001*** |
| hV4      | 218  | 0.995  | .370     | 237  | 30.059  | <.001*** |
| VO       | 146  | 24.882 | <.001*** | 167  | 28.314  | <.001*** |
| LO       | 195  | 4.618  | .010*    | 304  | 24.695  | <.001*** |
| V3AB     | 176  | 3.471  | .031*    | 129  | 18.098  | <.001*** |
| IPS0     | 49   | 12.339 | <.001*** | 45   | 11.335  | <.001*** |
| MT+      | 47   | 26.131 | <.001*** | 124  | 50.139  | <.001*** |
| combined | 2267 | 51.292 | <.001*** | 2469 | 163.225 | <.001*** |

Table 14: Statistics corresponding to Supplementary Figure 5 on pRF eccentricity changes in eccentricity bin 1. P-values reflect whether t-test showed that subject average values were different from 0, for each ROI. Single, double and triple asterisks indicate uncorrected significance of <.05, <.01 and <.001 respectively. Right most columns indicate in how many out of 5 subjects the bootstrap test over voxels was different from 0 with uncorrect p-value of < .05.

| ROI | N | p     | t      | $\Delta$ ecc | cohen's d | pos in | neg in |
|-----|---|-------|--------|--------------|-----------|--------|--------|
| V1  | 5 | .172  | -1.663 | -0.035       | -0.831    | 1      | 4      |
| V2  | 5 | .998  | 0.003  | 0.000        | 0.001     | 2      | 2      |
| V3  | 5 | .042* | 2.953  | 0.053        | 1.477     | 4      | 0      |
| hV4 | 5 | .052  | 2.729  | 0.124        | 1.365     | 5      | 0      |
| VO  | 5 | .017* | 3.903  | 0.393        | 1.952     | 5      | 0      |

| ROI      | N | p     | t     | $\Delta$ ecc | cohen's d | pos in | neg in |
|----------|---|-------|-------|--------------|-----------|--------|--------|
| LO       | 5 | .030* | 3.309 | 0.125        | 1.655     | 5      | 0      |
| V3AB     | 5 | .047* | 2.843 | 0.442        | 1.422     | 5      | 0      |
| IPS0     | 5 | .080  | 2.335 | 0.715        | 1.167     | 5      | 0      |
| MT+      | 5 | .089  | 2.237 | 0.858        | 1.119     | 5      | 0      |
| combined | 5 | .015* | 4.067 | 0.096        | 2.033     | 5      | 0      |

Table 15: Statistics corresponding to Supplementary Figure 5 on pRF eccentricity changes in eccentricity bin 2. P-values reflect whether t-test showed that subject average values were different from 0, for each ROI. Single, double and triple asterisks indicate uncorrected significance of <.05, <.01 and <.001 respectively. Right most columns indicate in how many out of 5 subjects the bootstrap test over voxels was different from 0 with uncorrect p-value of < .05.

| ROI      | N | p      | t      | $\Delta$ ecc | cohen's d | pos in | neg in |
|----------|---|--------|--------|--------------|-----------|--------|--------|
| V1       | 5 | .348   | -1.063 | -0.021       | -0.532    | 2      | 2      |
| V2       | 5 | .822   | 0.240  | 0.004        | 0.120     | 3      | 2      |
| V3       | 5 | .045*  | 2.884  | 0.075        | 1.442     | 4      | 0      |
| hV4      | 5 | .049*  | 2.805  | 0.216        | 1.402     | 5      | 0      |
| VO       | 5 | .014*  | 4.151  | 0.444        | 2.075     | 5      | 0      |
| LO       | 5 | .087   | 2.252  | 0.491        | 1.126     | 5      | 0      |
| V3AB     | 5 | .047*  | 2.837  | 0.623        | 1.419     | 5      | 0      |
| IPS0     | 5 | .009** | 4.674  | 0.753        | 2.337     | 4      | 0      |
| MT+      | 5 | .075   | 2.391  | 1.463        | 1.195     | 5      | 0      |
| combined | 5 | .056   | 2.671  | 0.103        | 1.335     | 5      | 0      |

Table 16: Statistics corresponding to Supplementary Figure 5 on pRF eccentricity changes in eccentricity bin 3. P-values reflect whether t-test showed that subject average values were different from 0, for each ROI. Single, double and triple asterisks indicate uncorrected significance of <.05, <.01 and <.001 respectively. Right most columns indicate in how many out of 5 subjects the bootstrap test over voxels was different from 0 with uncorrect p-value of < .05.

| ROI      | N | p      | t      | $\Delta$ ecc | cohen's d | pos in | neg in |
|----------|---|--------|--------|--------------|-----------|--------|--------|
| V1       | 5 | .296   | -1.202 | -0.022       | -0.601    | 0      | 2      |
| V2       | 5 | .556   | -0.642 | -0.012       | -0.321    | 1      | 3      |
| V3       | 5 | .057   | 2.651  | 0.081        | 1.326     | 4      | 0      |
| hV4      | 5 | .001** | 8.314  | 0.319        | 4.157     | 5      | 0      |
| VO       | 5 | .028*  | 3.355  | 0.897        | 1.678     | 5      | 0      |
| LO       | 5 | .120   | 1.969  | 0.444        | 0.985     | 4      | 0      |
| V3AB     | 5 | .053   | 2.714  | 0.557        | 1.357     | 5      | 0      |
| IPS0     | 5 | .007** | 5.103  | 1.234        | 2.551     | 5      | 0      |
| MT+      | 4 | .016*  | 4.896  | 1.378        | 2.827     | 4      | 0      |
| combined | 5 | .019*  | 3.799  | 0.044        | 1.900     | 5      | 0      |

Table 17: Statistics corresponding to Supplementary Figure 5 on pRF eccentricity changes in eccentricity bin 4. P-values reflect whether t-test showed that subject average values were different from 0, for each ROI. Single, double and triple asterisks indicate uncorrected significance of <.05, <.01 and <.001 respectively. Right most columns indicate in how many out of 5 subjects the bootstrap test over voxels was different from 0 with uncorrect p-value of < .05.

| ROI  | N | p    | t      | $\Delta$ ecc | cohen's d | pos in | neg in |
|------|---|------|--------|--------------|-----------|--------|--------|
| V1   | 5 | .369 | -1.011 | -0.016       | -0.506    | 0      | 3      |
| V2   | 5 | .071 | -2.442 | -0.059       | -1.221    | 0      | 3      |
| V3   | 5 | .085 | -2.273 | -0.063       | -1.136    | 0      | 3      |
| hV4  | 5 | .082 | 2.308  | 0.202        | 1.154     | 1      | 0      |
| VO   | 5 | .417 | 0.904  | 0.623        | 0.452     | 3      | 1      |
| LO   | 5 | .285 | 1.234  | 0.782        | 0.617     | 2      | 1      |
| V3AB | 5 | .122 | 1.960  | 0.154        | 0.980     | 1      | 0      |
| IPS0 | 5 | .516 | 0.711  | 0.533        | 0.356     | 2      | 1      |

| ROI      | N | p    | t      | $\Delta$ ecc | cohen's d | pos in | neg in |
|----------|---|------|--------|--------------|-----------|--------|--------|
| MT+      | 4 | .187 | 1.590  | 1.662        | 0.795     | 2      | 1      |
| combined | 5 | .273 | -1.270 | -0.031       | -0.635    | 1      | 3      |

Table 18: Statistics corresponding to Supplementary Figure 5 on pRF size changes in eccentricity bin 1. P-values reflect whether t-test showed that subject average values were different from 0, for each ROI. Single, double and triple asterisks indicate uncorrected significance of <.05, <.01 and <.001 respectively. Right most columns indicate in how many out of 5 subjects the bootstrap test over voxels was different from 0 with uncorrect p-value of < .05.

| ROI      | N | p     | t      | $\Delta$ ecc | cohen's d | pos dif | neg pos |
|----------|---|-------|--------|--------------|-----------|---------|---------|
| V1       | 5 | .768  | 0.315  | 0.002        | 0.158     | 1       | 1       |
| V2       | 5 | .511  | -0.721 | -0.003       | -0.361    | 1       | 1       |
| V3       | 5 | .777  | 0.304  | 0.002        | 0.152     | 2       | 0       |
| hV4      | 5 | .934  | -0.088 | -0.002       | -0.044    | 1       | 2       |
| VO       | 5 | .109  | 2.056  | 0.134        | 1.028     | 3       | 0       |
| LO       | 5 | .671  | 0.457  | 0.016        | 0.228     | 2       | 2       |
| V3AB     | 5 | .041* | 2.977  | 0.184        | 1.489     | 4       | 0       |
| IPS0     | 5 | .031* | 3.267  | 0.725        | 1.633     | 5       | 0       |
| MT+      | 5 | .124  | 1.943  | 0.603        | 0.971     | 4       | 0       |
| combined | 5 | .426  | 0.884  | 0.018        | 0.442     | 2       | 1       |

Table 19: Statistics corresponding to Supplementary Figure 5 on pRF size changes in eccentricity bin 2. P-values reflect whether t-test showed that subject average values were different from 0, for each ROI. Single, double and triple asterisks indicate uncorrected significance of <.05, <.01 and <.001 respectively. Right most columns indicate in how many out of 5 subjects the bootstrap test over voxels was different from 0 with uncorrect p-value of < .05.

| ROI | N | p    | t     | $\Delta$ ecc | cohen's d | pos dif | neg pos |
|-----|---|------|-------|--------------|-----------|---------|---------|
| V1  | 5 | .572 | 0.614 | 0.003        | 0.307     | 2       | 1       |
| V2  | 5 | .697 | 0.418 | 0.002        | 0.209     | 2       | 1       |
| V3  | 5 | .937 | 0.085 | 0.000        | 0.042     | 2       | 1       |

| ROI      | N | p     | t     | $\Delta$ ecc | cohen's d | pos dif | neg pos |
|----------|---|-------|-------|--------------|-----------|---------|---------|
| hV4      | 5 | .082  | 2.308 | 0.024        | 1.154     | 3       | 0       |
| VO       | 5 | .037* | 3.089 | 0.078        | 1.544     | 3       | 0       |
| LO       | 5 | .214  | 1.475 | 0.101        | 0.738     | 4       | 0       |
| V3AB     | 5 | .033* | 3.211 | 0.175        | 1.605     | 5       | 0       |
| IPSO     | 5 | .027* | 3.419 | 0.367        | 1.709     | 4       | 0       |
| MT+      | 5 | .058  | 2.631 | 0.656        | 1.316     | 5       | 0       |
| combined | 5 | .088  | 2.250 | 0.015        | 1.125     | 4       | 1       |

Table 20: Statistics corresponding to Supplementary Figure 5 on pRF size changes in eccentricity bin 3. P-values reflect whether t-test showed that subject average values were different from 0, for each ROI. Single, double and triple asterisks indicate uncorrected significance of <.05, <.01 and <.001 respectively. Right most columns indicate in how many out of 5 subjects the bootstrap test over voxels was different from 0 with uncorrect p-value of < .05.

| ROI      | N | p     | t      | $\Delta$ ecc | cohen's d | pos dif | neg pos |
|----------|---|-------|--------|--------------|-----------|---------|---------|
| V1       | 5 | .061  | 2.579  | 0.009        | 1.290     | 3       | 0       |
| V2       | 5 | .373  | -1.001 | -0.005       | -0.501    | 0       | 1       |
| V3       | 5 | .111  | -2.041 | -0.017       | -1.020    | 0       | 3       |
| hV4      | 5 | .376  | 0.995  | 0.022        | 0.498     | 1       | 0       |
| VO       | 5 | .773  | 0.308  | 0.031        | 0.154     | 3       | 1       |
| LO       | 5 | .800  | -0.271 | -0.007       | -0.135    | 1       | 0       |
| V3AB     | 5 | .085  | 2.280  | 0.068        | 1.140     | 3       | 0       |
| IPSO     | 5 | .034* | 3.164  | 0.297        | 1.582     | 4       | 0       |
| MT+      | 4 | .076  | 2.662  | 0.285        | 1.537     | 2       | 0       |
| combined | 5 | .800  | -0.270 | -0.002       | -0.135    | 1       | 2       |



Table 21: Statistics corresponding to Supplementary Figure 5 on pRF size changes in eccentricity bin 4. P-values reflect whether t-test showed that subject average values were different from 0, for each ROI. Single, double and triple asterisks indicate uncorrected significance of <.05, <.01 and <.001 respectively. Right most columns indicate in how many out of 5 subjects the bootstrap test over voxels was different from 0 with uncorrect p-value of < .05.

| ROI      | N | p     | t      | $\Delta$ ecc | cohen's d | pos dif | neg pos |
|----------|---|-------|--------|--------------|-----------|---------|---------|
| V1       | 5 | .800  | 0.270  | 0.002        | 0.135     | 1       | 1       |
| V2       | 5 | .122  | -1.959 | -0.021       | -0.979    | 0       | 3       |
| V3       | 5 | .028* | -3.386 | -0.058       | -1.693    | 0       | 4       |
| hV4      | 5 | .188  | -1.587 | -0.141       | -0.793    | 0       | 3       |
| VO       | 5 | .329  | -1.110 | -0.338       | -0.555    | 0       | 3       |
| LO       | 5 | .997  | -0.004 | 0.000        | -0.002    | 0       | 1       |
| V3AB     | 5 | .352  | -1.052 | -0.075       | -0.526    | 0       | 4       |
| IPSO     | 5 | .827  | -0.233 | -0.079       | -0.117    | 2       | 1       |
| MT+      | 5 | .257  | 1.322  | 0.349        | 0.661     | 2       | 0       |
| combined | 5 | .071  | -2.447 | -0.030       | -1.223    | 0       | 4       |

Table 22: Statistics corresponding to Supplementary Figure 6 on correlations between eccentricity and size changes. P-values are uncorrected two-tailed tests whether t-test of over subject pRF eccentricity and size change correlations is different from 0. Single and triple asterisks indicate uncorrected significance of <.01 and <.001 respectively. Right most columns indicate in how many out of 5 subjects the bootstrap test over voxels was different from 0 with uncorrect p-value of < .05.

| ROI  | R     | N | t      | p        | pos in | neg in |
|------|-------|---|--------|----------|--------|--------|
| V1   | 0.461 | 5 | 2.888  | .045*    | 2      | 0      |
| V2   | 0.704 | 5 | 6.411  | .003**   | 4      | 0      |
| V3   | 0.704 | 5 | 7.219  | .002**   | 5      | 0      |
| hV4  | 0.749 | 5 | 10.609 | <.001*** | 5      | 0      |
| VO   | 0.886 | 5 | 12.673 | <.001*** | 5      | 0      |
| LO   | 0.847 | 5 | 8.074  | .001**   | 5      | 0      |
| V3AB | 0.861 | 5 | 6.954  | .002**   | 5      | 0      |

| ROI      | R     | N | t     | p      | pos in | neg in |
|----------|-------|---|-------|--------|--------|--------|
| IPS0     | 0.500 | 5 | 2.450 | .070   | 3      | 0      |
| MT+      | 0.745 | 5 | 6.261 | .003** | 4      | 0      |
| combined | 0.799 | 5 | 5.431 | .006** | 4      | 0      |

Table 23: Statistics corresponding to Supplementary Figure 10. Astrisk indicate whether the average feature AMI over subjects was different from 0 with  $p < .05$ . Right most columns indicate in how many out of 5 subjects the bootstrap test over voxels was different from 0 with uncorrect p-value of  $< .05$ .

| ROI  | N | mean diff | t     | p     | cohen d | pos in | neg in |
|------|---|-----------|-------|-------|---------|--------|--------|
| V1   | 5 | 0.065     | 4.008 | .016* | 2.004   | 4      | 0      |
| V2   | 5 | 0.040     | 4.195 | .014* | 2.097   | 4      | 0      |
| V3   | 5 | 0.028     | 1.985 | .118  | 0.992   | 2      | 0      |
| hV4  | 5 | 0.055     | 3.235 | .032* | 1.618   | 4      | 0      |
| VO   | 5 | 0.079     | 1.594 | .186  | 0.797   | 2      | 0      |
| LO   | 5 | 0.026     | 1.122 | .325  | 0.561   | 2      | 1      |
| V3AB | 5 | 0.111     | 3.243 | .032* | 1.621   | 4      | 0      |
| IPS0 | 5 | 0.113     | 2.218 | .091  | 1.109   | 2      | 0      |
| MT+  | 5 | 0.060     | 1.531 | .201  | 0.766   | 3      | 0      |

Table 24: Statistics corresponding to Supplementary Figure 11. Astrisk indicate whether the spearman correlation between feature preference and eccentricity over subjects was different from 0 with  $p < .05$ . Right most columns indicate in how many out of 5 subjects the bootstrap test over voxels was different from 0 with uncorrect p-value of  $< .05$ .

| ROI | N | corr   | p     | pos in | neg in |
|-----|---|--------|-------|--------|--------|
| V1  | 5 | -0.218 | .031* | 0      | 5      |
| V2  | 5 | -0.210 | .090  | 0      | 3      |
| V3  | 5 | -0.181 | .084  | 0      | 4      |
| hV4 | 5 | -0.222 | .095  | 0      | 3      |
| VO  | 5 | -0.294 | .088  | 0      | 3      |

| ROI  | N | corr   | p    | pos in | neg in |
|------|---|--------|------|--------|--------|
| LO   | 5 | -0.133 | .138 | 0      | 4      |
| V3AB | 5 | -0.250 | .105 | 1      | 3      |
| IPS0 | 5 | -0.183 | .076 | 0      | 2      |
| MT+  | 5 | -0.273 | .085 | 0      | 2      |
